# Supplementary material for: Indicators of Global Climate Change 2024: annual update of key indicators of the state of the climate system and human influence
Source: Copernicus journal article supplement (doi:10.5194/essd-2025-250), 2025-05-05
Supplement: Supplementary file 1 [file essd-2025-250-supplement.pdf]

1     **S1. Context**

2     The IPCC Special Report on Global Warming of 1.5°C (SR1.5), published in 2018, provided an assessment of the level of  
3     human-induced warming and cumulative emissions to date (Allen et al., 2018) and the remaining carbon budget (Rogelj et al.,  
4     2018) to support the evidence base on how the world is progressing in terms of meeting aspects of the Paris Agreement. The  
5     AR6 WGI Report, published in 2021, assessed past, current and future changes of these and other key global climate indicators,  
6     as well as undertaking an assessment of the Earth’s energy budget. It also updated its approach for estimating human-induced  
7     warming and global warming level. In AR6 WGI and here, reaching a level of global warming is defined as the global surface  
8     temperature change, averaged over a 20-year period, exceeding a particular level of global warming, e.g. 1.5°C global  
9     warming. Given the current rates of change and the likelihood of reaching 1.5°C of global warming in the first half of the  
10    2030s (Lee J.-Y. et al., 2021; Lee et al., 2023; Riahi et al., 2022), it is important to have robust, trusted, and also timely climate  
11    indicators in the public domain to form an evidence base for effective science-based decision making.

12    **S2. Emissions**

13

14    **Table S1 The three GHG emissions estimates and their underlying datasets.**

| Estimate                          | Source                                                                                               | Datasets                                                                                                                                | Reference                                                             |
|-----------------------------------|------------------------------------------------------------------------------------------------------|-----------------------------------------------------------------------------------------------------------------------------------------|-----------------------------------------------------------------------|
| WGIII update                      | CO <sub>2</sub> -FFI and CO <sub>2</sub> -LULUCF                                                     | GCB v2024                                                                                                                               | Friedlingstein et al., 2025                                           |
|                                   | CH <sub>4</sub> , N <sub>2</sub> O                                                                   | PRIMAP Hist-TP v2.6.1                                                                                                                   | Gütschow et al., 2025                                                 |
|                                   | UNFCCC F-gases                                                                                       | CIP v2025: Climate Indicators Project (this article), with underlying data from NOAA and AGAGE inversions (see Sect. 3 main manuscript) | Main paper; Lan et al., 2025; Dutton et al., 2024; Prinn et al., 2018 |
| WGIII update + additional sources | CO <sub>2</sub> -FFI, CO <sub>2</sub> -LULUCF, CH <sub>4</sub> , N <sub>2</sub> O and UNFCCC F-gases | As for WGIII update                                                                                                                     | Friedlingstein et al., 2025, Gütschow et al., 2025, Lan               |

|                   |                                                                             |                                                                                                                                         |                                                           |
|-------------------|-----------------------------------------------------------------------------|-----------------------------------------------------------------------------------------------------------------------------------------|-----------------------------------------------------------|
|                   |                                                                             |                                                                                                                                         | et al., 2025; Dutton et al., 2024; Prinn et al., 2018     |
|                   | Biomass fires (CH <sub>4</sub> and N <sub>2</sub> O)                        | GFED v4.1                                                                                                                               | van der Werf et al., 2017                                 |
|                   | ODS F-gases                                                                 | CIP v2025: Climate Indicators Project (this article), with underlying data from NOAA and AGAGE inversions (see Sect. 3 main manuscript) | Lan et al., 2025; Dutton et al., 2024; Prinn et al., 2018 |
|                   | Cement carbonation                                                          | GCB v2024                                                                                                                               | Friedlingstein et al., 2025                               |
| Inventory aligned | CO <sub>2</sub> -FFI, CH <sub>4</sub> , N <sub>2</sub> O and UNFCCC F-gases | PRIMAP Hist-CR v2.6.1                                                                                                                   | Gütschow et al., 2025                                     |
|                   | CO <sub>2</sub> -LULUCF                                                     | Grassi NGHGI v2024                                                                                                                      | Grassi et al., 2024                                       |

## S2.1 Calculation of uncertainties and CO<sub>2</sub> equivalent emissions in Section 2

We follow the same approach for estimating uncertainties and CO<sub>2</sub>-equivalent emissions as in AR6: CO<sub>2</sub>-equivalent emissions were calculated using global warming potentials with a 100-year time horizon (GWP100 henceforth) from AR6 WGI Chap. 7 (Forster et al., 2021). Uncertainty ranges were based on a comparative assessment of available data and expert judgment, corresponding to a 90 % confidence interval (Minx et al., 2021):  $\pm 8$  % for CO<sub>2</sub>-FFI,  $\pm 70$  % for CO<sub>2</sub>-LULUCF,  $\pm 30$  % for CH<sub>4</sub> and F-gases, and  $\pm 60$  % for N<sub>2</sub>O (note that the GCB assesses 1 standard deviation uncertainty for CO<sub>2</sub>-FFI as  $\pm 5$  % and for CO<sub>2</sub>-LULUCF as  $\pm 2.6$  GtCO<sub>2</sub>; Friedlingstein et al., 2025). The total uncertainty was summed in quadrature, assuming independence of estimates per species/source. Reflecting these uncertainties, AR6 WGIII reported emissions to two significant figures only. Uncertainties in GWP100 metrics of roughly  $\pm 10$  % were not applied (Minx et al., 2021).

27 **S3. Greenhouse gas concentrations**

28 Naming conventions and details for Sect. 3 of the main paper and herein follow AR6 WGI Chapter 2 (Gulev et al., 2021).

29 **Table S2 Annual mean concentrations of well-mixed greenhouse gases in 2023, 2022, 2019, 1850 and 1750. Except for CO<sub>2</sub>, CH<sub>4</sub> and**  
30 **N<sub>2</sub>O, concentrations all are in parts per trillion by volume [ppt]. For halogenated gases, concentrations are stated for each gas, with**  
31 **equivalents for HFCs, PFCs and Montreal gases given as the radiative equivalent of the most abundant gas in each category.**

| <b>Greenhouse gas</b>              | <b>1750</b> | <b>1850</b> | <b>2019</b>   | <b>2023</b>  | <b>2024</b>  |
|------------------------------------|-------------|-------------|---------------|--------------|--------------|
| CO <sub>2</sub> [ppm]              | 278.4       | 285.6       | 410.1         | 419.4        | 422.8        |
| CH <sub>4</sub> [ppb]              | 729.2       | 807.6       | 1866.5        | 1922.1       | 1929.7       |
| N <sub>2</sub> O [ppb]             | 270.1       | 272.1       | 332.1         | 336.9        | 337.9        |
| NF <sub>3</sub>                    | 0           | 0           | 2.1           | 3.1          | 3.4          |
| SF <sub>6</sub>                    | 0           | 0           | 10            | 11.4         | 11.8         |
| SO <sub>2</sub> F <sub>2</sub>     | 0           | 0           | 2.5           | 2.9          | 3            |
| <b>HFCs as HFC-134a-eq</b>         | <b>0</b>    | <b>0</b>    | <b>237.1</b>  | <b>302.7</b> | <b>312.3</b> |
| HFC-134a                           | 0           | 0           | 107.6         | 129.5        | 134.7        |
| HFC-23                             | 0           | 0           | 32.4          | 36.7         | 37.3         |
| HFC-32                             | 0           | 0           | 19.5          | 32.5         | 35.7         |
| HFC-125                            | 0           | 0           | 29.6          | 44.2         | 45.4         |
| HFC-143a                           | 0           | 0           | 24            | 31.1         | 30.2         |
| HFC-152a                           | 0           | 0           | 7.1           | 7.5          | 7.9          |
| HFC-227ea                          | 0           | 0           | 1.6           | 2.3          | 2.4          |
| HFC-236fa                          | 0           | 0           | 0.2           | 0.2          | 0.3          |
| HFC-245fa                          | 0           | 0           | 3.1           | 3.8          | 3.9          |
| HFC-365mfc                         | 0           | 0           | 1.1           | 1.2          | 1.1          |
| HFC-43-10mee                       | 0           | 0           | 0.3           | 0.3          | 0.3          |
| <b>PFCs as CF<sub>4</sub>-eq</b>   | <b>34.1</b> | <b>34.1</b> | <b>109.7</b>  | <b>115.8</b> | <b>117.4</b> |
| CF <sub>4</sub>                    | 34          | 34          | 85.5          | 89.4         | 90.4         |
| C <sub>2</sub> F <sub>6</sub>      | 0           | 0           | 4.8           | 5.2          | 5.3          |
| C <sub>3</sub> F <sub>8</sub>      | 0           | 0           | 0.7           | 0.8          | 0.8          |
| c-C <sub>4</sub> F <sub>8</sub>    | 0           | 0           | 1.8           | 2            | 2.1          |
| n-C <sub>4</sub> F <sub>10</sub>   | 0           | 0           | 0.2           | 0.2          | 0.2          |
| n-C <sub>5</sub> F <sub>12</sub>   | 0           | 0           | 0.1           | 0.2          | 0.2          |
| n-C <sub>6</sub> F <sub>14</sub>   | 0           | 0           | 0.2           | 0.2          | 0.2          |
| i-C <sub>6</sub> F <sub>14</sub>   | 0           | 0           | 0.1           | 0.1          | 0.1          |
| C <sub>7</sub> F <sub>16</sub>     | 0           | 0           | 0.1           | 0.1          | 0.1          |
| C <sub>8</sub> F <sub>18</sub>     | 0           | 0           | 0.1           | 0.1          | 0.1          |
| <b>Montreal gases as CFC-12-eq</b> | <b>8.5</b>  | <b>8.5</b>  | <b>1031.9</b> | <b>1005</b>  | <b>996.1</b> |
| CFC-12                             | 0           | 0           | 503           | 487.2        | 482.9        |

|            |     |     |       |       |       |
|------------|-----|-----|-------|-------|-------|
| CFC-11     | 0   | 0   | 226.2 | 216.8 | 214.5 |
| CFC-113    | 0   | 0   | 69.8  | 67.2  | 66.6  |
| CFC-114    | 0   | 0   | 16    | 16    | 16    |
| CFC-115    | 0   | 0   | 8.7   | 8.9   | 8.9   |
| CFC-13     | 0   | 0   | 3.3   | 3.4   | 3.4   |
| CFC-112    | 0   | 0   | 0.4   | 0.4   | 0.4   |
| CFC-112a   | 0   | 0   | 0.1   | 0.1   | 0.1   |
| CFC-113a   | 0   | 0   | 0.9   | 1.3   | 1.4   |
| CFC-114a   | 0   | 0   | 1     | 1     | 1     |
| HCFC-22    | 0   | 0   | 246.8 | 248.1 | 245.9 |
| HCFC-141b  | 0   | 0   | 24.4  | 24.6  | 24.5  |
| HCFC-142b  | 0   | 0   | 22.3  | 21.5  | 21.2  |
| HCFC-133a  | 0   | 0   | 0.4   | 0.4   | 0.4   |
| HCFC-31    | 0   | 0   | 0.1   | 0.1   | 0.1   |
| HCFC-124   | 0   | 0   | 1     | 0.9   | 0.9   |
| CH3CCl3    | 0   | 0   | 1.6   | 0.9   | 0.8   |
| CCl4       | 0   | 0   | 78    | 73.9  | 72.9  |
| CH3Cl      | 457 | 457 | 540.8 | 542.8 | 542.7 |
| CH3Br      | 5.3 | 5.3 | 6.5   | 6.5   | 6.5   |
| CH2Cl2     | 6.9 | 6.9 | 40.6  | 48.1  | 49.9  |
| CHCl3      | 4.8 | 4.8 | 8.8   | 7.6   | 7.3   |
| Halon-1211 | 0   | 0   | 3.3   | 2.9   | 2.8   |
| Halon-1301 | 0   | 0   | 3.3   | 3.3   | 3.4   |
| Halon-2402 | 0   | 0   | 0.4   | 0.4   | 0.4   |

**S4. Short-Lived Climate Forcers (SLCFs)**

**Table S3 Emissions of the major SLCFs in 1750, 2019, 2022, 2023 and 2024 from a combination of CEDS and GFED and CAMS for the 2024 trend. Provisional estimates used in Forster et al. (2023) and Forster et al. (2024) are shown. Emissions of SO<sub>2</sub>+SO<sub>4</sub> use SO<sub>2</sub> molecular weights. Emissions of NO<sub>x</sub> use NO<sub>2</sub> molecular weights. VOCs are for the total mass.**

| Compound | 1750 | 2019<br>(WGI) | 2019<br>(updated<br>with<br>CEDS v<br>2025_03-<br>18 and<br>GFEDv4) | 2022<br>(Forster et<br>al., 2023) | 2022<br>(updated<br>with<br>CEDS v<br>2025_03-<br>18 and<br>GFEDv4) | 2023<br>(Forster et<br>al., 2024) | 2023<br>(updated<br>with<br>CEDS v<br>2025_03-<br>18 and<br>GFEDv4) | 2024<br>(CEDS v<br>2025_03-<br>18 and<br>GFEDv4) |
|----------|------|---------------|---------------------------------------------------------------------|-----------------------------------|---------------------------------------------------------------------|-----------------------------------|---------------------------------------------------------------------|--------------------------------------------------|
|----------|------|---------------|---------------------------------------------------------------------|-----------------------------------|---------------------------------------------------------------------|-----------------------------------|---------------------------------------------------------------------|--------------------------------------------------|

|                                                                                |       |       |       |       |       |       |       |       |
|--------------------------------------------------------------------------------|-------|-------|-------|-------|-------|-------|-------|-------|
| Sulphur dioxide (SO <sub>2</sub> ) + sulphate (SO <sub>4</sub> <sup>2-</sup> ) | 2.8   | 84.2  | 80.9  | 75.3  | 70.6  | 79.1  | 72.7  | 71.2  |
| Black carbon (BC)                                                              | 2.1   | 7.5   | 7.3   | 6.8   | 6.7   | 7.3   | 7.6   | 7.5   |
| Organic carbon (OC)                                                            | 15.5  | 34.2  | 33.0  | 25.8  | 25.6  | 40.7  | 41.0  | 36.1  |
| Ammonia (NH <sub>3</sub> )                                                     | 6.6   | 67.6  | 66.3  | 67.3  | 66.8  | 71.1  | 72.7  | 70.6  |
| Oxides of nitrogen (NO <sub>x</sub> )                                          | 19.4  | 141.7 | 133.6 | 130.4 | 123.2 | 139.4 | 128.4 | 130.4 |
| Volatile organic compounds (VOCs)                                              | 60.9  | 217.3 | 204.8 | 183.9 | 176.4 | 228.1 | 224.1 | 212.7 |
| Carbon monoxide (CO)                                                           | 348.4 | 853.8 | 816.1 | 686.4 | 665.4 | 917.5 | 896.0 | 845.3 |

38

39

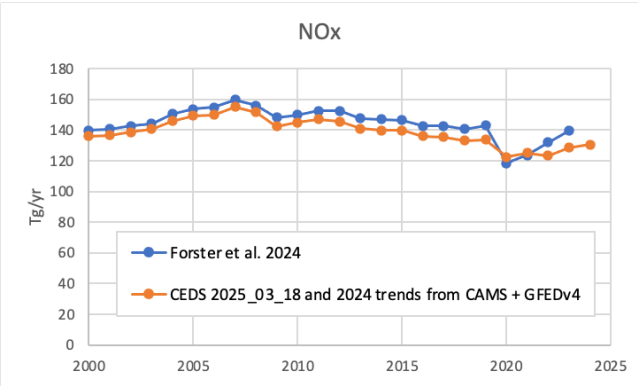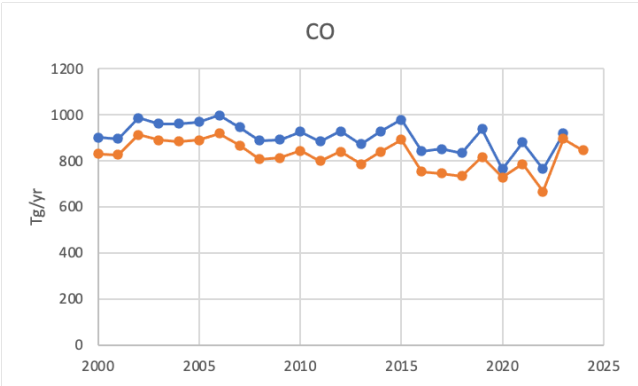

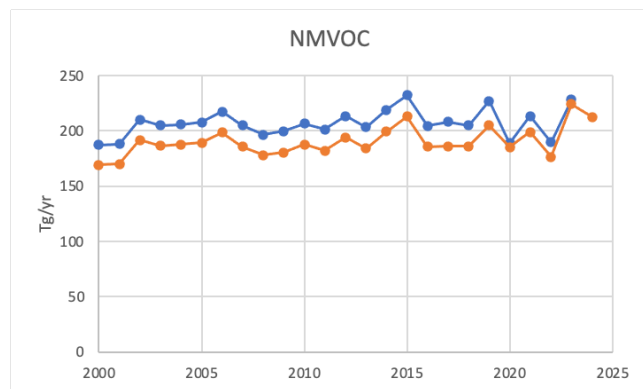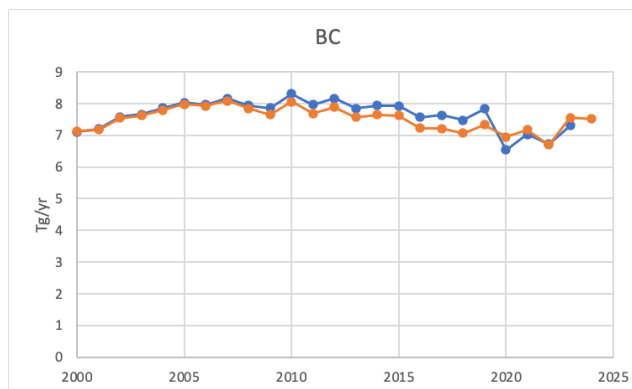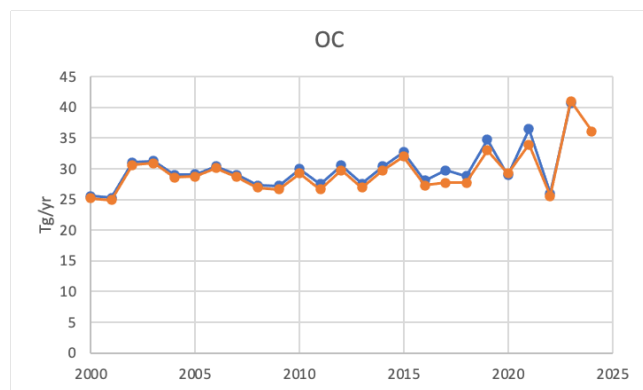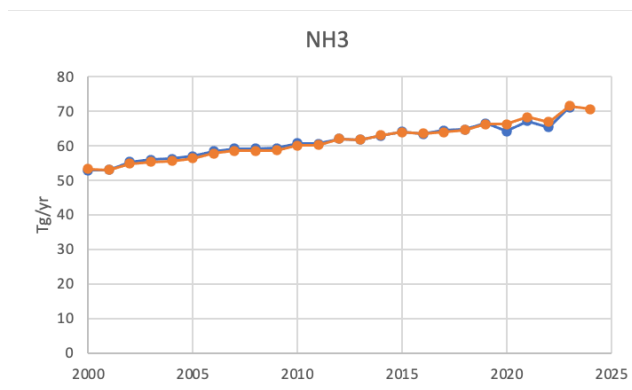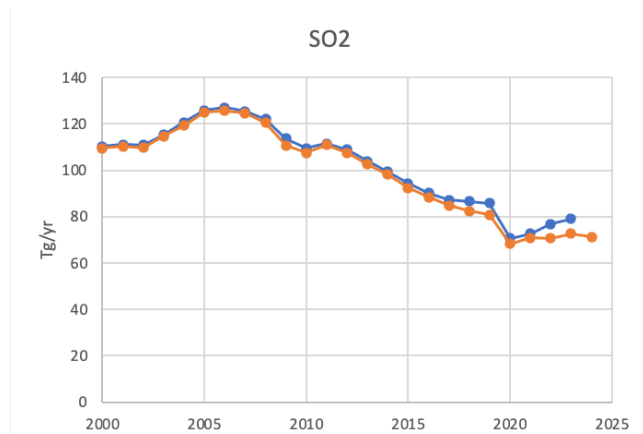

**Figure S1 Comparison of short-lived climate forcer emissions from Forster et al. (2024) (blue) and the most recent update of CEDS and GFED through 2023, with 2024 trend from CAMS (orange). (Granier et al., 2019; Jalkanen et al. 2012, 2016; Johansson et al., 2017).**

## 44 **S5. Effective radiative forcing (ERF)**

### 45 **S5.1 Well-mixed greenhouse gas ERF methods**

46 Radiative forcing (RF) from CO<sub>2</sub>, CH<sub>4</sub> and N<sub>2</sub>O use the simplified formulas from concentrations in Meinshausen et al. (2020),  
47 derived from an updated functional fit to Etminan et al. (2016) line-by-line radiative transfer results. These formulas are, to  
48 first order, logarithmic with CO<sub>2</sub> concentrations and a square-root dependence for CH<sub>4</sub> and N<sub>2</sub>O, with additional corrections  
49 and radiative band overlaps between gases. RF is converted to ERF using scaling factors (1.05, 0.86 and 1.07 for CO<sub>2</sub>, CH<sub>4</sub>,  
50 N<sub>2</sub>O respectively) that account for tropospheric and land-surface rapid adjustments (Smith et al., 2018a; Hodnebrog et al.,  
51 2020a). ERF from other GHGs is assumed to scale linearly with their concentration based on their radiative efficiencies  
52 expressed in W m<sup>-2</sup> ppb<sup>-1</sup> (Hodnebrog et al., 2020b, Smith et al., 2021b). A scaling factor translating RF to ERF is implemented  
53 for CFC-11 (1.13) and CFC-12 (1.12) (Hodnebrog et al., 2020a), whereas no model evidence exists to treat ERF differently to  
54 RF for other halogenated gases.

55

56 Relative uncertainties in the ERF for CO<sub>2</sub> (± 12%), CH<sub>4</sub> (± 20%) and N<sub>2</sub>O (± 14%) are unchanged from AR6. These stem from  
57 a combination of spectroscopic uncertainties and uncertainties in the adjustment terms converting RF to ERF; uncertainties in  
58 the volume mixing concentrations themselves are assessed to be small (Sect. 2). Uncertainties in the ERF from halogenated  
59 gases are treated individually and are assessed as ±19% for gases with a lifetime of 5 or more years and ±26% for shorter  
60 lifetime gases. In AR6, a ±19% uncertainty was applied to the sum of the ERF from all halogenated gases. To maintain a  
61 consistent uncertainty range across the sum of ERF from halogenated gases with AR6, we inflate the uncertainty in each  
62 individual gas by a factor of 2.05. Uncertainties are applied by scaling the full ERF time series for each gas.

### 63 **S5.2 Aerosol ERF methods**

64 Aerosol ERF is a combination of contributions from aerosol-radiation interactions (ERFari) and aerosol-cloud interactions  
65 (ERFaci).

#### 66 **S5.2.1 Aerosol-radiation interactions**

67 Contributions to ERFari are assumed to scale linearly with certain SLCF emissions in Sect. 3 (SO<sub>2</sub>, BC, OC, NH<sub>3</sub>, NO<sub>x</sub> and  
68 VOC) or concentrations (CH<sub>4</sub>, N<sub>2</sub>O and ozone-depleting halocarbons) of primary aerosols and chemically active precursor  
69 species. The coefficients converting emissions or concentrations of each SLCF into ERF and its uncertainty come from Chapter  
70 6 of AR6 WGI (Szopa et al., 2021), originally from CMIP6 AerChemMIP models (Thornhill et al., 2021a). We scale these

coefficients to reproduce the headline AR6 WGI ERF<sub>ari</sub> assessment of -0.3 W m<sup>-2</sup> from 1750 to 2005-2014. Uncertainties are applied as a scale factor for each species and applied to the whole time series.

The inclusion of more species that affect ERF<sub>ari</sub> differs from the AR6 WGI calculation of ERF<sub>ari</sub> in Chapter 7, which only used SO<sub>2</sub>, BC, OC and NH<sub>3</sub> (Smith et al., 2021b). In the update, these four species remain the dominant aerosol and aerosol precursors. Additionally, these coefficients have changed slightly due to switching to CMIP6 era data. In AR6, the coefficients scaling emissions to ERF for SO<sub>2</sub>, BC, OC and NH<sub>3</sub> were provided by CMIP5-era models (Myhre et al., 2013a). The additional coefficients and slight changes to their magnitude had an imperceptible effect on the results but have been included to align with current best practice. This might be important in future years as NO<sub>x</sub> and VOC precursors might make up a larger fraction of ERF<sub>ari</sub>.

### S5.2.2 Aerosol-cloud interactions

ERF<sub>aci</sub> is estimated by assuming a logarithmic relationship with the change in cloud droplet number concentration (CDNC) as

$$\text{ERF}_{\text{aci}} = \beta \log (1 + \Delta \text{CDNC}) \quad (\text{S1})$$

$$\Delta \text{CDNC} = s_{\text{SO}_2} \Delta E_{\text{SO}_2} + s_{\text{BC}} \Delta E_{\text{BC}} + s_{\text{OC}} \Delta E_{\text{OC}} \quad (\text{S2})$$

where  $s_{\text{SO}_2}$ ,  $s_{\text{BC}}$  and  $s_{\text{OC}}$  are sensitivities of the change in CDNC with the change in emissions of SO<sub>2</sub>, BC and OC respectively ( $\Delta E$ ). This relationship is fit to estimates of ERF<sub>aci</sub> in 13 CMIP6 models contributing results to the piClim-histaer and histSST-piAer experiments of RFMIP and AerChemMIP, respectively, to CMIP6 (Smith et al., 2024). The ERF<sub>aci</sub> in these 13 models is estimated using the Approximate Partial Radiative Perturbation (APRP) method (Taylor et al., 2007; Zelinka et al., 2014; Zelinka et al., 2023a).

The  $s_{\text{SO}_2}$ ,  $s_{\text{BC}}$  and  $s_{\text{OC}}$  values from each model are combined into a kernel density estimate and sampled 100,000 times to provide a CMIP6-informed distribution of these parameters. To obtain  $\beta$  for each sample given ( $s_{\text{SO}_2}$ ,  $s_{\text{BC}}$ ,  $s_{\text{OC}}$ ) a target ERF<sub>aci</sub> value for 1750 to 2005-2014 is drawn from the headline AR6 distribution of -1.0 [-1.7 to -0.3] W m<sup>-2</sup> and eq. (S1) rearranged. This follows a very similar procedure to AR6 and is based on Smith et al. (2021a) with three updates. Firstly, the relationships in eqs. (S1) and (S2) are slightly updated and simplified (Smith et al., 2024). Secondly, an additional two CMIP6 models have become available since the AR6 WG1 assessment which expands the sampling pool for coefficients from 11 to 13. Thirdly, a



slight error in computing ERF<sub>faci</sub> from APRP from the CMIP6 models in Smith et al. (2021a) has been corrected (Zelinka et al., 2023b).

### S5.3 Ozone ERF methods

In AR6 WGI Chapter 7, the ozone ERF is derived from CMIP6 model-based estimates (Skeie et al., 2020) from 1850 to 2014, to infer the sensitivity of ozone RF to emissions of NO<sub>x</sub>, VOC and CO, concentrations of CH<sub>4</sub>, N<sub>2</sub>O and ozone-depleting halogens, and global mean surface temperature (GMST) anomaly. These factors can be found in Table 7.SM.3 of AR6. In CMIP6, experimental results that vary CO and VOC emissions separately are not available, so individual contributions from CO and VOC to the CO+VOC total are based on their fractional contributions from ACCMIP (CMIP5-era) models in Stevenson et al. (2013). To compute the ozone ERF we thus use the radiative efficiencies for ozone ERF and the scale factor to CH<sub>4</sub>, N<sub>2</sub>O and ozone-depleting halogens concentration changes discussed in the paper and CO, NMVOC and NO<sub>x</sub> emission changes discussed in the paper. For the global mean temperature contribution to ozone forcing (in terms of W m<sup>-2</sup> K<sup>-1</sup>), we use the model responses to ozone forcing per degree warming in chemistry-enabled models in abrupt-4xCO<sub>2</sub> experiments (Thornhill et al., 2021b), and apply this factor to the observed GMST anomaly from Sect. 7. Following AR6, we do not differentiate between stratospheric and tropospheric ozone, and we also assume that ERF is the same as RF as there is limited model evidence to suggest otherwise.

### S5.4 ERF from land use change and irrigation

In Forster et al., (2024), ERF from land use and irrigation was scaled with cumulative CO<sub>2</sub> emissions from AFOLU from 1750, as the IPCC AR6 assessment from Ghimire et al. (2014) did not extend beyond 2005, and the IPCC assessment used cumulative AFOLU CO<sub>2</sub> emissions to estimate land use and irrigation ERF from 2005 to 2019. In IGCC 2024, we use land use transitions from the Land Use Harmonization v2 (LUH2) dataset (Hurtt et al., 2020) updated for the Global Carbon Budget (GCB) 2024 (Chini et al., 2021; Friedlingstein et al., 2025) using cropland and grazing land data from HYDE3.4 (Klein Goldewijk et al., 2017) that itself merges the latest FAO state-level data with MapBiomas satellite-based estimates for Brazil and Indonesia (Souza et al., 2020) and another recent estimate for China (Yu et al., 2022). This constitutes an update to the Ghimire et al. (2014) data that used LUH1, using the satellite-derived albedo-related parameters of Ouyang et al. (2022) and providing data for 1750-2023, which we extrapolate one year to 2024. The resulting global ERF is scaled by a factor of 1.28 to recover the Ghimire et al. (2014) surface reflectance assessment of -0.15 W m<sup>-2</sup> in 2005 relative to 1750 to ensure consistency with the AR6. For irrigation, we assume the forcing scales with the area of land irrigated. We create a timeseries of this irrigated land area, using FAOSTAT (FAO, 2024) from 1961-2022, and Angelakis et al. (2021) to extend back to 1750. Angelakis et al.

(2021) provide data points from 1900 in their Figure 21, and give a value for 1800 in the text. We assume the 1800 value (8 megahectares as compared to 354 megahectares in 2022) applies to 1750 and apply a cubic spline fit to produce a time series of irrigated area from 1750 to 1961 which is scaled to match the 1961 FAOSTAT irrigated area. The irrigated area in 2019 is assumed to result in the AR6 assessment of irrigation forcing of  $-0.05 \text{ W m}^{-2}$  in 2019 (having its roots in Sherwood et al., 2018), and irrigation forcing is linear with irrigated area relative to this benchmark. We note that since the publication of AR6, more Earth System models incorporating transient historical irrigation are available (Yao et al., 2025), and could be used to provide an assessment of the ERF of irrigation in future.

## **S5.5 ERF from other anthropogenic forcings**

Minor categories of anthropogenic forcings include contributions from land use and land use change other than via GHG emissions, aviation contrails and contrail-induced cirrus, stratospheric water vapour from methane oxidation, and light absorbing particles on snow and ice.

The methodology to estimate ERF from land use and land-use change, including irrigation, has been updated to be more consistent with AR6 (Sect. 5). We anchor the 1750-2019 assessment to be the same as AR6 at  $-0.15 [-0.25 \text{ to } -0.05] \text{ W m}^{-2}$  for the ERF from surface albedo changes and  $-0.05 [-0.10 \text{ to } +0.05] \text{ W m}^{-2}$  for irrigation under this updated methodology.

Stratospheric water vapour from methane oxidation was assessed to be  $0.05 [0.00 \text{ to } 0.10] \text{ W m}^{-2}$  in AR6 for 1750-2019, and is assumed to change linearly with changes in methane concentration.

The ERF from light absorbing particles on snow and ice (LAPSI) is assumed to scale with emissions of black carbon. As in AR6, the contribution from brown carbon is assumed to be negligible. We align the coefficient that converts BC emissions to ERF from LAPSI to match the  $0.08 [0.00 \text{ to } 0.18] \text{ W m}^{-2}$  assessment in AR6 for 1750-2019.

To estimate ERF from aviation contrails and contrail-induced cirrus in AR6, emissions of NO<sub>x</sub> from the aviation sector in CEDS were scaled to reproduce an ERF of  $0.0574 [0.019 \text{ to } 0.098] \text{ W m}^{-2}$  for 1750-2018 as assessed in Lee D. S. et al. (2021). We more closely follow the original methods of Lee D. S. et al. (2021) in this update to base our ERF estimates as closely as possible on aviation activity data. The Lee D.S. et al. (2021) ERF time series is extended to 2022 based on aviation fuel consumption from the International Energy Agency's (IEA) World Oil Statistics (2024). For 2023 and 2024, we use fuel consumption data from the International Air Transport Association (IATA, 2024).

159 **S5.5 Methods for estimating natural forcing**

160 Natural forcing is composed of solar irradiance and volcanic eruptions.

161 **S5.5.1 Solar irradiance**

162 The method to compute solar forcing is unchanged from AR6, using a composite time series prepared for PMIP4 (Jungclaus  
163 et al., 2017) and CMIP6 (Matthes et al., 2017). The headline assessment of solar ERF is based on the most recent solar cycle  
164 (2009-2019), which is unchanged from AR6. Solar ERF estimates are computed relative to complete solar cycles encompassing  
165 the full “pre-industrial” period where proxy data exists (6754 BCE to 1745 CE). The CMIP7 solar forcing time series for the  
166 historical period (1850–2023) is now available (Funke et al., 2024). However, it has changed from the CMIP6 time series and  
167 does not seamlessly transition to the pre-1850 period including the last several thousand years, nor does it extend forward to  
168 include 2024. In future editions of IGCC, the CMIP7 solar forcing product could be used if the data spans the appropriate  
169 periods.

170 **S5.5.2 Volcanic**

171 Volcanic ERF consists of contributions from stratospheric sulphate aerosol optical depth (sAOD; a negative forcing) and  
172 stratospheric water vapour (sWV, a positive forcing). The sAOD time series (at a nominal wavelength of 550 nm) is constructed  
173 from a combination of four datasets which have temporal overlap. We use ice-core deposition data from HolVol v1.0 (Sigl et  
174 al., 2022) for 9500 BCE to 1749 CE. For 1750 to 2023 we use the CMIP7 volcanic sAOD dataset (Durack et al., 2025) using  
175 the 550 nm spectral band, which is an update from IGCC 2023 that used the CMIP6 volcanic sAOD dataset. There is a seamless  
176 transition between HolVol and CMIP7 in 1750, so no blending of datasets was required. In previous editions of IGCC, we  
177 used the Global Space-based Stratospheric Aerosol Climatology (GloSSAC) product of sAOD which provided data until the  
178 penultimate year (Thomason et al., 2018), however, with the availability of the CMIP7 dataset to 2023, GloSSAC is not  
179 required directly in this year’s IGCC. Additionally, the CMIP7 dataset incorporates GloSSAC from 1979 to 2023. For 2024,  
180 we use the Ozone Mapping and Profiling Limb Profiler (OMPS LP) Level 3 aerosol optical depth at 745 nm, which is scaled  
181 to achieve the same time mean sAOD as GloSSAC v2.22 (Kovilakam et al., 2020) in the overlapping 2013-2023 period as a  
182 single Ångström exponent is not suggested for this conversion. The 745 nm band from OMPS-LP is used as this is reported to  
183 be more stable than the bands closer to 550 nm from OMPS LP (Taha et al., 2021). For comparison we estimate the 550 nm  
184 sAOD from GloSSAC v2.22 using the 525 nm band and an Ångström exponent of -2.33, and we find good correspondence to  
185 the CMIP7 sAOD time series for the 1979-2023 common period. Therefore, while GloSSAC is not used directly this year, it  
186 is used as an anchor and reference for both the CMIP7 and OMPS-LP datasets. sAOD is converted to a radiative effect using  
187 a scaling factor of  $-20 \pm 5$  as in AR6 (Smith et al., 2021b) that is representative of CMIP5 and CMIP6 models. ERF is calculated

with reference to the change in this radiative effect since “pre-industrial”, defined as the mean of all available years before 1750 CE. In other words, the mean of the pre-1750 period is defined as zero forcing.

The January 2022 eruption of Hunga Tonga-Hunga Ha’apai (HTHH) was an exceptional episode in that it emitted large amounts of water vapour into the stratosphere (Millán et al., 2022; Sellitto et al., 2022). Jenkins et al. (2023) determined the HTHH eruption increased volcanic ERF in 2022 by  $+0.12 \text{ W m}^{-2}$  due to sWV. In IGCC 2024 we update this value from Jenkins et al. (2023), which used an idealised injection of water vapour, to use direct satellite retrievals of water vapour from the Microwave Limb Sounder (MLS) data on board the Aura platform. Using the MLS data in place of the Jenkins et al. (2023) spatial distribution, we update the 2022 volcanic sWV ERF to  $+0.14 \text{ W m}^{-2}$ , and find that in the MLS data the stratospheric water vapour plume persists into 2023 ( $+0.18 \text{ W m}^{-2}$ ) and 2024 ( $+0.15 \text{ W m}^{-2}$ ) (Fig. S2). These water vapour forcings are calculated in a similar fashion to in Jenkins et al. (2023), by implementing the stratospheric water vapour in 2022, 2023 and 2024 from MLS against a climatology derived from MLS using the 2004–2021 years. The instantaneous radiative forcing at the tropopause is calculated using the SOCRATES radiative transfer model (Edwards and Slingo, 1996), against a background climatology (atmospheric temperatures, humidity, cloud profiles, ozone profiles, surface albedo and surface temperature) taken from ECMWF ERA5 reanalysis (Hersbach et al., 2020). From the CMIP7 and GloSSAC data the peak addition of stratospheric aerosols was around 0.007 optical depth units in the global mean, resulting in a peak volcanic aerosol forcing of  $-0.14 \text{ W m}^{-2}$  in mid-2022 relative to the pre-HTHH baseline that decayed away with an e-folding lifetime of around 18 months. We conclude using this analysis that the net HTHH ERF from both sAOD and sWV was positive (but small) in 2022, 2023 and 2024, and attempting to back out HTHH from other small eruptions gives a best estimate ERF for HTHH in isolation of  $+0.03 \text{ W m}^{-2}$  in 2022,  $+0.10 \text{ W m}^{-2}$  in 2023 and  $+0.10 \text{ W m}^{-2}$  in 2024. This is in contrast to other studies that assess a net negative (Gupta et al., 2025) or zero (Schoeberl et al., 2024) impact of HTHH, using different methods.

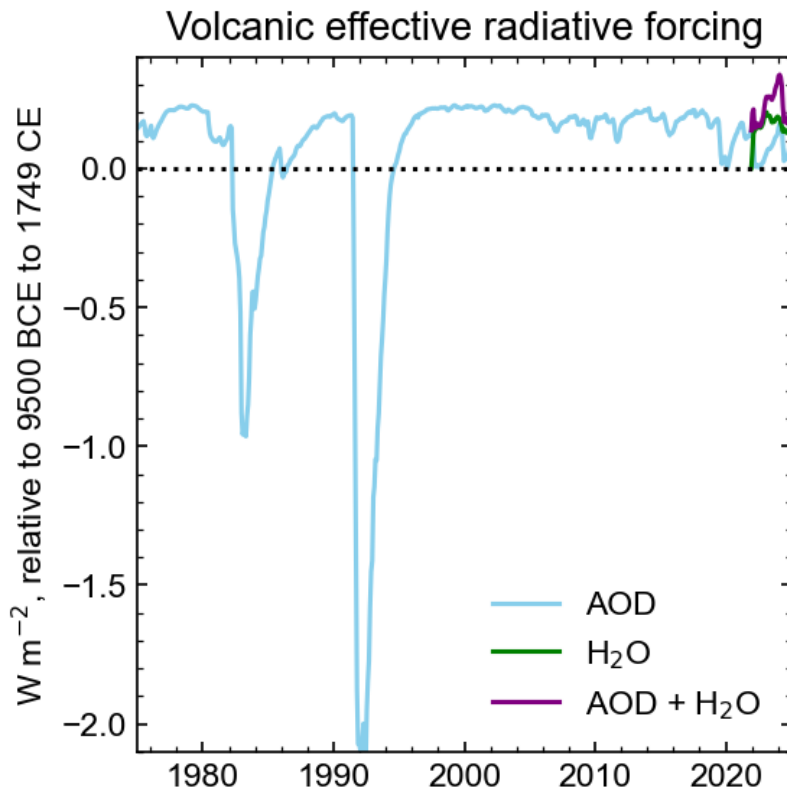

**Figure S2 Volcanic effective radiative forcing from 1975 to present relative to the pre-1750 baseline. The impact of including stratospheric water vapour from Hunga Tonga-Hunga Ha’apai (green) can be observed in 2022, 2023 and 2024 by increasing the net volcanic ERF above the background level (purple).**

## S6. Earth energy imbalance

While changes in EEI have been effectively monitored at the top of the atmosphere by satellites since the mid-2000s, we rely on estimates of OHC change to determine the absolute magnitude of EEI and its evolution on inter-annual to multi-decadal time series. The AR6 assessment of ocean heat content change for the 0–2000 m layer was based on global annual mean time series from five ocean heat content datasets: IAP (Cheng et al., 2017), Domingues et al. (2008), EN4 (Good et al., 2013), JMA (Ishii et al., 2017) and NCEI (Levitus et al., 2012). Four of these datasets routinely provide updated OHC time series for the BAMS State of the Climate report, and all are used for the GCOS Earth heat inventory (von Schuckmann et al., 2020, 2023a)

and the annual WMO State of the Global Climate report. The uncertainty assessment for the 0–2000 m layer used the ensemble method described by Palmer et al. (2021) that separately accounts for parametric (referred to in the plots below as “mapping uncertainty”) and structural uncertainty. The OHC change >2000 m and associated uncertainty were assessed based on trend analysis of the available hydrographic data following Purkey and Johnson (2010). All five of the datasets used for the 0–2000 m OHC assessment are now updated at least annually and should in principle support an AR6 assessment time series update within the first few months of each year. There is potential to increase the observational ensemble used in the assessment by supplementing this set with additional data products that are also available annually for future updates. A full propagation of uncertainties across all heat inventory components depends on the specific choice of time period, and different estimates are not directly comparable. Therefore, we take a simple pragmatic approach, using the total ocean heat content uncertainty as a proxy for the total uncertainty, since this term is 2 orders of magnitude larger than the other terms (Forster et al., 2021). To provide estimates of the EEI up to the year 2024, we scale up the values of OHC change in 2021, 2022, 2023 and 2024 to reflect the ~ 90 % contribution of the ocean to changes in the Earth heat inventory. The EEI is then simply computed as the difference in global energy inventory over each period, converted to units of watts per square metre ( $\text{W m}^{-2}$ ) using the surface area of the Earth and the elapsed time. The uncertainties in the global energy inventory for the end-point years are assumed to be independent and added in quadrature, following the approach used in AR6 (Forster et al., 2021). Estimates of EEI should also account for the other elements of the Earth heat inventory, i.e. the atmospheric warming, the latent heat of global ice loss and heating of the continental land surface (Forster et al., 2021; Cuesta-Valero et al., 2021, 2023a; Steiner et al., 2020; Nitzbon et al., 2022a; Vanderkelen et al., 2020; Adusumilli et al., 2022). Some of these components of the Earth heat inventory are routinely updated by a community-based initiative reported in von Schuckmann et al. (2020, 2023a). However, in the absence of annual updates to all heat inventory components, a pragmatic approach is to use recent OHC change as a proxy for EEI, scaling the value up as required based on historical partitioning between Earth system components.

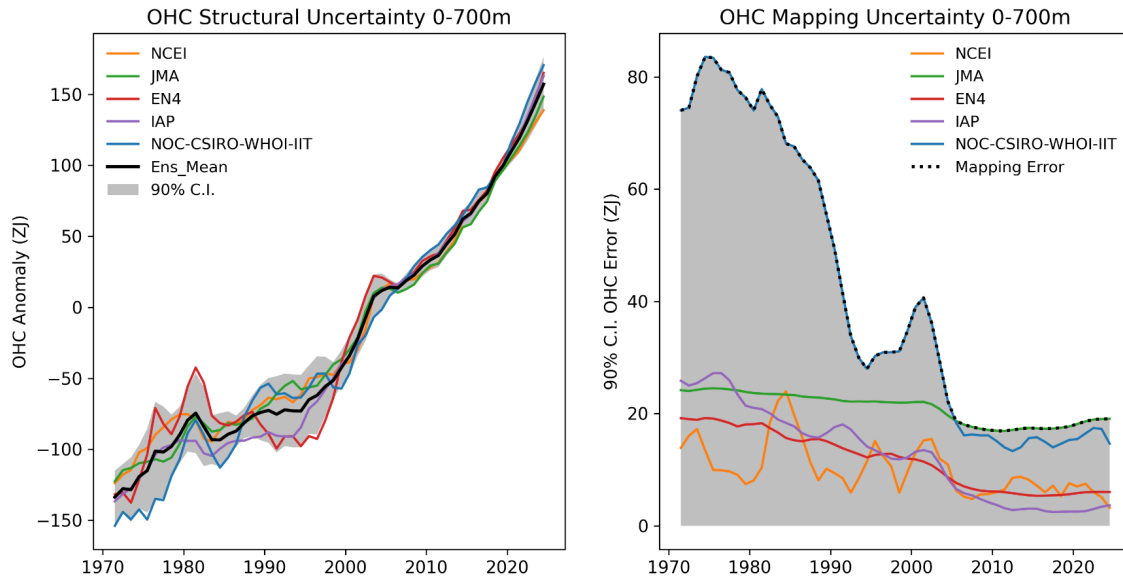

**Figure S3 (Left)** Ocean heat content timeseries for the 0-700 m layer with the estimate of structural uncertainty indicated by the grey shaded region and expressed as a 90% confidence interval (*very likely* range) in units of Zetta Joules ( $1 \text{ ZJ} = 10^{21} \text{ Joules}$ ). **(Right)** Individual estimates of the mapping uncertainty with the ensemble mapping uncertainty (the maximum across all available estimates) shown by the dotted line and grey shaded region. Mapping uncertainty is expressed as a 90% confidence interval (*very likely* range) in units of Zetta Joules ( $1 \text{ ZJ} = 10^{21} \text{ Joules}$ ).

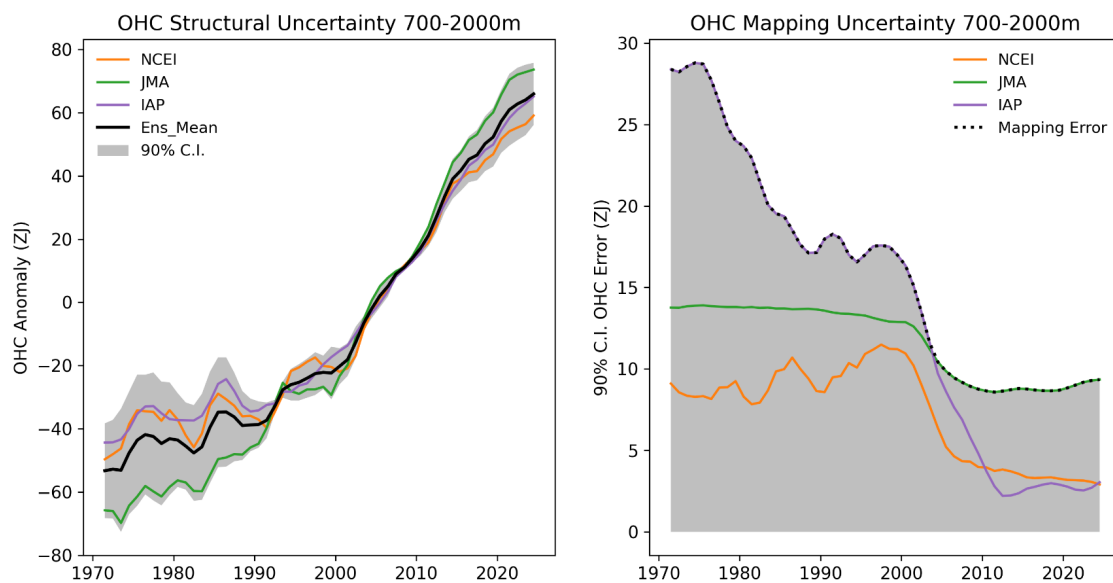

**Figure S4 As Figure S3 but for ocean heat content in the 700-2000 m layer.**

## **S7. Global surface temperature**

Surface temperature information on land and sea is available with low latency through WMO distribution channels, with monthly station data from a substantial number of stations reported within a few days of the end of the month. Sea-surface temperature data from ships and buoys are gathered from the Global Telecommunication System with a short delay. These are consolidated into global data sets by a number of institutions, making it feasible to report GMST updates within a few weeks of the end of the period of interest. The number of reporting locations on land with near-real time data available for reporting for the most recent periods is typically less than that available for historical data, as not all observation sites report recent data reliably, but this lower observation density only slightly increases the uncertainty in estimates of recent annual GMST compared with the past 20-30 years (Trewin et al., 2021).

The GMST assessment in AR6 was largely based on four datasets: HadCRUT5 (Morice et al., 2021), Berkeley Earth (Rohde and Hausfather, 2020), NOAA GlobalTemp - Interim (Vose et al., 2021) and Kadow et al. (2020). The four GMST datasets were chosen by virtue of being quasi globally complete, having data back to 1850, using the most recent generation of SST analyses and using analysed (rather than climatological) values over sea ice. The first two of these are routinely updated



operationally, with data for each year becoming available in the first few weeks of the following year. NOAAGlobalTemp - Interim was not updated operationally at the time AR6 was published but became NOAA's main operational GMST dataset (under the name NOAAGlobalTemp 5.1) as of January 2023. All three datasets are updated and published monthly. The dataset by Kadow et al. is updated on an ad hoc basis by the authors. A fifth data set, China - Mean Surface Temperature (China-MST) (Sun et al., 2021), which meets all the GMST dataset criteria except for treatment of sea ice areas, is used both in AR6 and here for global temperatures over land areas only. Although the version of the Kadow et al. (2020) dataset reported in that paper used HadCRUT4 as its base, the version used in AR6 and subsequently used HadCRUT5 as its base.

In 2023, there was a significant version change to NOAAGlobalTemp (now version 6.0.0). This is the current operational version and is used in this paper. This uses a new artificial neural network approach to reconstruct temperatures over land (Huang et al., 2022) in place of the empirical orthogonal teleconnection approach used in version 5.1. This change has little impact on long-term trends at global scale since the low-frequency component in the land surface air temperature (LSAT) reconstruction has not changed, but has a substantial impact on spatial and short-term temporal variability. Version 6.0.0 shows approximately 0.01 °C less warming from 1850-1900 to recent time periods (such as 2013-2022) than version 5.1, principally due to differences in the early part of the 1850-1900 baseline period. A new version of the ERSST sea surface temperature analysis (v6) has been developed (Huang et al., 2025), but as of March 2025, NOAAGlobalTemp 6.0.0 still uses ERSSTv5 as its SST component.

To date, all four GMST datasets remain supported, and those version changes which have occurred since AR6 have not had a material impact on long-term temperature changes, but it is likely that more substantive version changes will occur to one or more over time, potentially leading to differences from the AR6. Version changes to date since AR6 have resulted in the warming from 1850-1900 to 2011-2020, 2010-2019 and 2001-2020 each being 0.01 °C greater in the most recent dataset versions than that reported in AR6.

A new version of the China-MST dataset (v3.0) has been developed and is used as part of the land component of the assessment of this paper. The land component of this uses the C-LSAT 2.1 dataset (Xu et al., 2025). Compared with earlier versions, C-LSAT 2.1 has substantially more stations and a substantially greater areal data coverage, as well as new homogenisation methods. China-MST v3.0 shows more warming over the common 1850-1900 to 2014-2023 period than the v2.0 version used in 2023 and earlier, with warming of 1.61 °C in v3.0 compared with 1.53 °C in v2.0. This change brings China-MST into closer alignment with the other four datasets although it still shows the least amount of warming of the five.

298 The key differences between the AR6 datasets and those used in the annual WMO and BAMS State of the Climate reports are  
299 that WMO and BAMS also incorporate reanalyses (ERA5 and JRA-3Q, which superseded JRA-55 during 2024). These reports  
300 also include the GISTEMP (Lenssen et al., 2019) dataset (excluded by AR6 because it starts in 1880) but do not include the  
301 dataset by Kadow et al. (as that is not updated operationally).

302

303 The GMST values used in AR6 were calculated from the gridded data sets produced by the data providers, using a consistent  
304 methodology - calculating the mean anomaly for each of the northern and southern hemisphere as a latitude-weighted mean of  
305 available gridpoint values, then defining the global mean anomaly as the mean of the two hemispheric values. (This is  
306 equivalent to the method used by the Met Office Hadley Centre to report global values from HadCRUT5). The values thus  
307 calculated may differ from those reported by the data providers themselves, due to different averaging methodologies.  
308 Although the difference is less pronounced in the AR6 datasets than in earlier generations of datasets, there are more gridpoints  
309 with missing data in the Southern Hemisphere than the Northern (particularly before an observation network was established  
310 on Antarctica in the 1950s), and using hemispheric means ensures that the two hemispheres are equally weighted.

311

312 The uncertainty assessment in AR6 combines the spread of the individual datasets with uncertainties derived from ensembles  
313 for HadCRUT5 and an earlier version of NOAA GlobalTemp, with the other two datasets assumed to have the same uncertainty  
314 as HadCRUT5. HadCRUT5 is the only one of the datasets for which regularly updated ensembles are currently produced,  
315 limiting the extent to which uncertainty assessments can be regularly updated from those used in AR6. In this update it was  
316 assumed that the width of the confidence interval for each individual dataset was the same as that used in AR6.

317

318 A number of new global temperature products have been published in the last year (e.g. Chan et al., 2024; Calvert, 2024). It is  
319 anticipated that there will be a review over the coming year of the datasets used in global temperature assessment, both in  
320 forthcoming versions of this publication (and ultimately the IPCC AR7) and in WMO reporting.

321

322 **2023 and 2024 temperature anomalies**

323

GSAT interannual anomalies from CMIP6 (15 models) at ANT\_GWL = 1.36°C  
conditional to phases of OND [yr-1] ENSO and AMV modes of variability

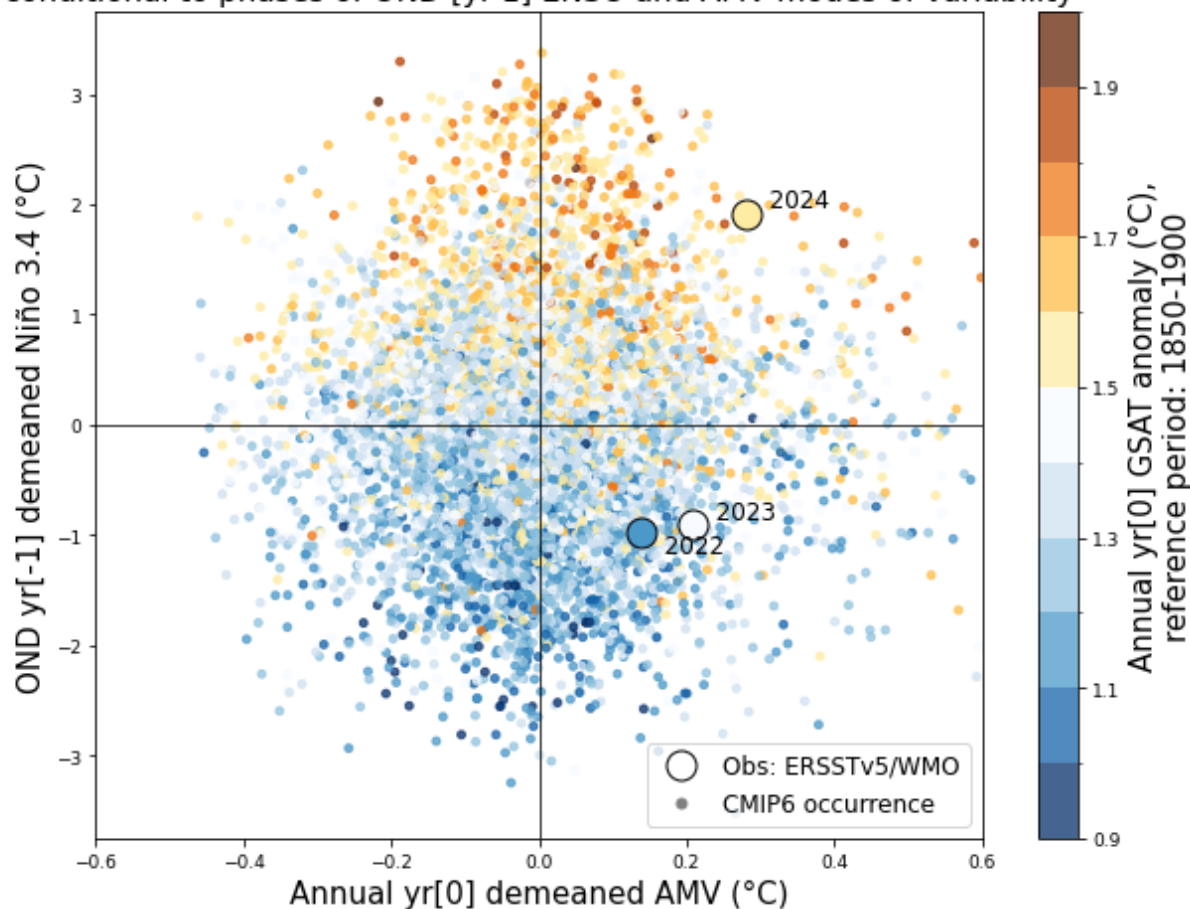

**Figure S5 Global surface air temperature (GSAT) interannual anomalies from CMIP6 models (plain coloured dots) at anthropogenically-forced global warming (ANT\_GWL) equal to 1.36°C as a function of ENSO estimated by Oct-Dec mean of SST(y-axis) and AMV (x-axis). Larger dots stand for 2022, 2023 and 2024 observed values from ERSSTv5 for the modes of variability and from WMO consolidated values for GSAT. SST Anomalies for the modes of variability are calculated from the residual of SST obtained after removing the modelled forced response estimated as model ensemble mean.**

While comprehensive syntheses have yet to be published, we provide a preliminary estimate of the contribution of different factors by combining the results of recent studies of their respective forcings using the FaIR climate model (Leach et al., 2021)

334 (Figure S6). We calculate the residuals of 0.18 °C and 0.26 °C for 2023 and 2024, respectively, relative to an expectation of  
335 smoothly rising temperatures calculated over the period prior through to the end of 2022 using a locally linear regression with  
336 a bandwidth of 20 years (WMO, 2025). This is not a full attribution study; the results are rather presented with associated  
337 caveats to provide a possible explanation of the anomalous temperatures in 2023 and 2024 compared to prior years.

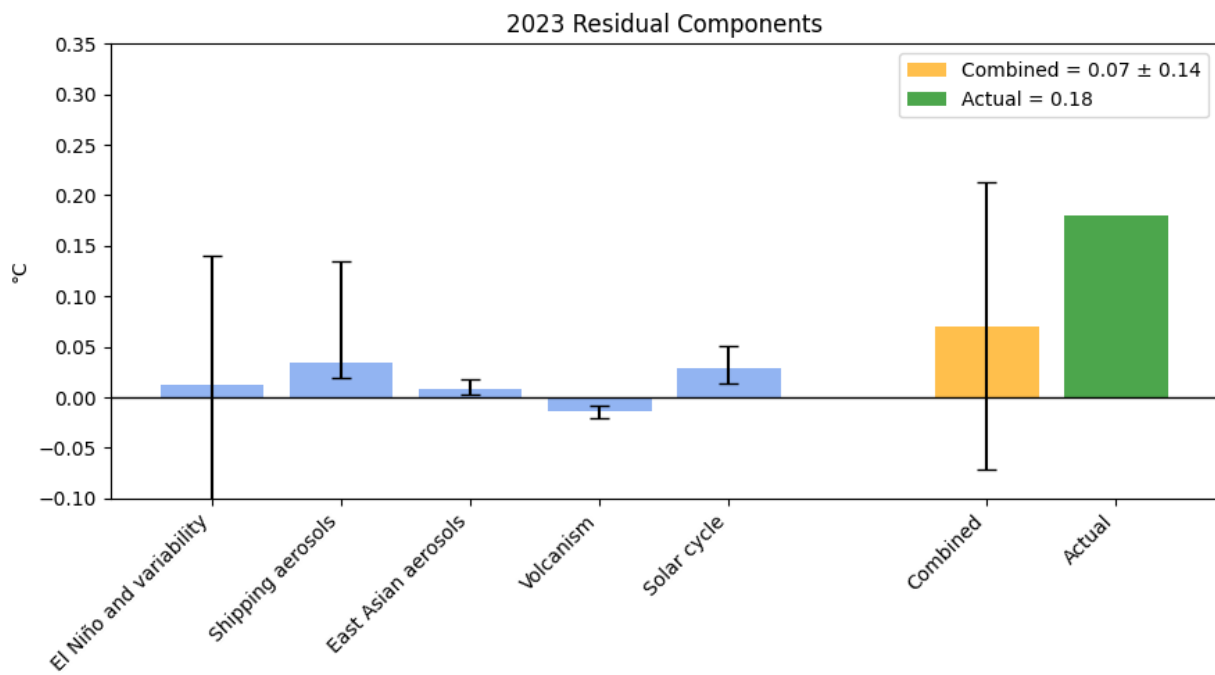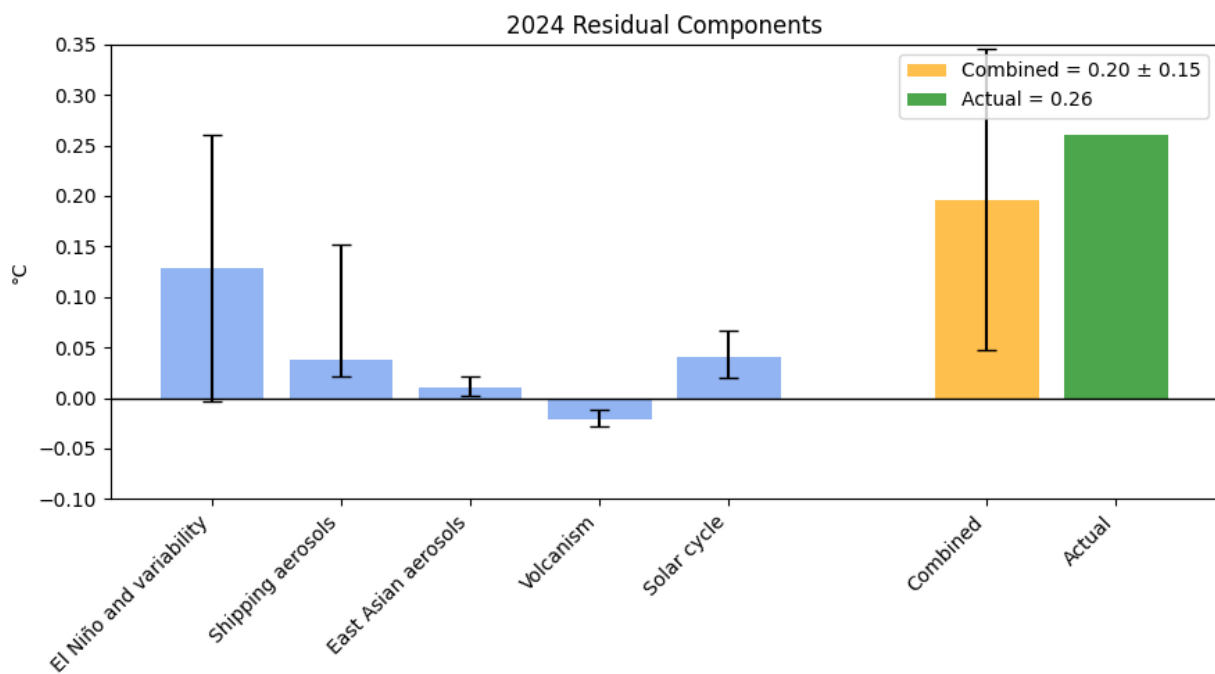

**Figure S6 Assessed contributions to 2023 and 2024 global surface temperature residuals relative to the expected warming approach described above. The combined bar shows the combination of individual contributions, with uncertainties added in quadrature. Note that aerosol-related factors reflect declines in aerosol emissions that were previously masking warming. Actual residuals are shown in green.**

The impact of ENSO on the temperatures can be estimated in multiple ways. A linear regression of the annual mean relative anomaly on the Feb/Mar Niño 3.4 index suggests an impact of  $-0.07^{\circ}\text{C}$ ,  $0.01^{\circ}\text{C}$  and  $0.13^{\circ}\text{C}$  for 2022, 2023 and 2024 respectively (95% CI,  $\pm 0.13^{\circ}\text{C}$ ). It is important to note that the uncertainties in the ENSO response estimated here also incorporate other sources of unforced internal (modes of variability in other basins like AMV), and potentially some forced variability, and the bar in Figure S6 is labelled “El Niño and variability” to reflect this. While some results from pre-industrial control climate model simulations (Raghuraman et al., 2024) suggest a transition from triple-dip La Niña to El Niño can produce an anomalous jump of up to  $0.25^{\circ}\text{C}$  in the year of transition, but it is unclear how to apply this to 2023 since one would need to condition the effect on the ENSO change that was actually experienced.

The IMO regulation change in 2020 led to a quick reduction of about  $8.4\text{ TgSO}_2/\text{yr}$  and a step change of radiative forcing between  $0.08$  and  $0.14\text{ Wm}^{-2}$ , estimated from a review of seven studies to-date: Gettelman et al, 2024; Jordan and Henry, 2024; Quaglia and Visoni, 2024; Yoshioka et al, 2024; Yuan et al, 2024; Watson-Parris et al, 2024; Skeie et al, 2024. An eighth study (Hansen et al., 2025) finds a much higher forcing value of  $0.5\text{ Wm}^{-2}$ . The median temperature impacts across these different forcing estimates were calculated as  $0.03^{\circ}\text{C}$  (95% CI of  $0.02^{\circ}\text{C}$  to  $0.14^{\circ}\text{C}$ ) in 2023 and  $0.04^{\circ}\text{C}$  ( $0.02^{\circ}\text{C}$  to  $0.15^{\circ}\text{C}$ ) in 2024 using FaIR, with the Hansen et al. forcing estimate responsible for the high upper bound. The latter is partly taken into account in SSP scenarios used in the above-documented probability of occurrence of the 2024 event based on CMIP6 (Szopa et al., 2021).

Chinese sulphate aerosol emissions have fallen sharply from their peak in 2006 ( $38\text{ TgSO}_2/\text{yr}$ ), down 39% by 2014 ( $23\text{ TgSO}_2/\text{yr}$ ), and an additional 56% through 2022 ( $10\text{ TgSO}_2/\text{yr}$ ) (CEDS 2024). On its own this would lead to additional radiative forcing of  $0.14\text{ Wm}^{-2}$  and a warming of  $0.06^{\circ}\text{C}$  ( $\pm 0.04^{\circ}\text{C}$ ) in 2023 compared to a world where East Asian harmful aerosol emissions remained at 2006 levels, based on FaIR calculations performed here. But some of this decline will have already affected the long-term trends, and so the anomaly in 2023 and 2024 relative to 2020 is only  $0.01^{\circ}\text{C}$  (calculated using FaIR).

369 The HTHH event added both SO<sub>2</sub> and water vapor to the stratosphere (up to 56 km in altitude). SO<sub>2</sub> was rapidly oxidized in  
370 sulphate aerosols, whose effects dominated the radiative forcing for the first two years after the eruption, and so the net  
371 radiative forcing at the tropopause was likely negative; the combination of HTHH and subsequent volcanism resulted in  $-0.04$   
372  $\text{Wm}^{-2}$  and  $-0.15 \text{ Wm}^{-2}$  in 2022 and 2023 respectively (Schoeberl et al., 2024), implying a temperature impact of  $-0.02 \text{ }^{\circ}\text{C}$  ( $-$   
373  $0.01 \text{ }^{\circ}\text{C}$  to  $-0.03 \text{ }^{\circ}\text{C}$ ) calculated using FaIR.

374  
375 Solar cycle 25 was both slightly earlier and slightly stronger than prior expectations, and the impact of the Total Solar  
376 Irradiance (TSI) anomaly of  $0.97 \text{ Wm}^{-2}$  in 2023 relative to the mean of the prior 20 years is a radiative forcing of approximately  
377  $0.17 \text{ Wm}^{-2}$  and an estimated global mean surface temperatures impact of  $0.03 \text{ }^{\circ}\text{C}$  ( $0.01 \text{ }^{\circ}\text{C}$  to  $0.05 \text{ }^{\circ}\text{C}$ ) in 2023 and  $0.04 \text{ }^{\circ}\text{C}$  ( $0.02$   
378  $^{\circ}\text{C}$  to  $0.07 \text{ }^{\circ}\text{C}$ ) in 2024 calculated using FaIR.

379  
380 In total, the additional radiative forcings in recent years and consequent warming combined with the impact of ENSO come  
381 close to explaining the residuals taking into account the uncertainties, though more so in 2024 than in 2023. While the effects  
382 of ENSO and other modes of internal variability (especially in the Atlantic where 2023 was extreme (Guinaldo et al., 2025)),  
383 changes in the solar cycle, and volcanism are likely to subside, the additional warming unmasked by declining shipping and  
384 East Asian aerosol emissions will persist.

## 385 **S8 Human-induced global warming**

### 386 **S8.1 Estimates of global surface temperature: GMST and GSAT in attributed warming assessments**

387 AR6 WGI (Chap. 2 Cross-Chap. Box 2.3, Gulev et al., 2021) described how global mean surface air temperature (GSAT), as  
388 is typically diagnosed from climate models, is physically distinct from the global mean surface temperature (GMST) estimated  
389 from observations, which generally combine measurements of near-surface temperature over land and in some cases over ice,  
390 with measurements of sea surface temperature over the ocean. Gulev et al. (2021) assessed with high confidence that long-  
391 term trends in the two indicators differ by less than 10 %. However, based on conflicting lines of evidence from climate models  
392 and direct observations, the former showing stronger warming of GSAT compared to GMST, the latter tending to show the  
393 opposite, there is low confidence in the sign of the difference in trends. Therefore, with medium confidence, in AR6 WGI  
394 Chap. 3 (Eyring et al., 2021), the best estimates and likely ranges for attributable warming expressed in terms of GMST were  
395 assessed to be equal to those for GSAT, which means that the AR6 attributable warming assessment does not distinguish  
396 between GMST and GSAT. As such, while WGI Chap. 3 (Eyring et al., 2021) treated estimates of attributable warming in  
397 GSAT and GMST from the literature together without any rescaling, we note that climate-model-based estimates of attributable

warming in GSAT are expected to be systematically higher than corresponding estimates of attributable warming in GMST (see e.g. Cowtan et al., 2015; Richardson et al., 2018; Beusch et al., 2020; Gillett et al., 2021). Therefore, given an opportunity to update these analyses from AR6, it is more consistent and more comparable with observations of GMST to report attributable changes in GMST using all three methods (described in Sect. S7). The SR1.5 assessment of attributable warming was given in terms of GMST, which is continued here. Therefore, in line with Sect. 7, AR6 WGI, and SR1.5, we adopt GMST as the estimate of global surface temperature. Findings are presented in Figs. S7, S9 and S9 and Tables S4 and S5.

## **S8.2 Methods to estimate human-induced warming**

Both SR1.5 and AR6 drew on evidence from a range of literature for their assessments of human-induced warming, before selecting results from a smaller subset to produce a quantified estimate. While both the SR1.5 and AR6 assessments used the latest Global Warming Index (GWI) results (Haustein et al., 2017), AR6 also incorporated results from two other methods, regularised optimal fingerprinting (ROF) (as in Gillett et al., 2021) and kriging for climate change (KCC) (as in Ribes et al., 2021). In AR6, all three methods gave results consistent not only with each other but also results from AR6 WGI Chap. 7 (see WGI Chap. 7 Supplementary Material (Smith et al., 2021b), Fig. 3.8 of AR6 WGI Chap. 3 (Eyring et al., 2021), and Figs. S7, S8 and S9). Note that the results from Chap. 7 were not included in the AR6 WGI final calculation because they were not statistically independent of other methods. Of the methods used, two (Gillett et al., 2021; Ribes et al., 2021) relied on CMIP6 DAMIP (Gillett et al., 2016) simulations which ended in 2020 and hence require modifications to update to the most recent years. The other two methods (Haustein et al., 2017; Smith et al., 2021b) are fully updatable and can also be made consistent with other aspects of the AR6 assessment and methods. The three methods used in the final assessment of contributions to warming in AR6 are used again with revisions for this annual update and are presented here along with any updates to their approaches.

### **S8.2.1 Global Warming Index**

Introduced in Otto et al. (2015), and refined with full uncertainty assessment in Haustein et al. (2017), the Global Warming Index (GWI) quantifies anthropogenic warming by using an established “multi-fingerprinting” approach to decompose total warming into its various components; preliminary anthropogenic and natural warming time series are first estimated from radiative forcings, and a multivariate linear regression is then taken between these preliminary GMST contributions and observed GMST, with the best fit providing the attributed anthropogenic and natural contributions to warming. As such, the GWI attribution method is directly tied to observations and therefore the resulting central estimate for human-induced warming has a relatively small dependence on the size of the uncertainties in climate sensitivity and forcing.

426



427 Substantive annual updates to the GWI assessment depend on annual updates for effective radiative forcings (ERFs) and  
428 observed temperature (GMST), both of which are provided as a part of this update (Sects. 5 and 7 respectively). The remaining  
429 inputs to the GWI assessment are updated at the less-frequent CMIP cadence; however, these contributions only weakly  
430 influence the GWI results. Further, by recomputing a “historical-only” GWI time series based only on data up to a given year,  
431 it can be shown that GWI is relatively insensitive to end-date or short-term fluctuations in observed GMST, minimising  
432 potential confusion about the current level of warming, such as the perception of a hiatus or acceleration (see AR6 WGI  
433 Chapter 3 Cross-Chapter Box 3.1, Eyring et al., 2021), due to short-term internal variability. This, combined with the  
434 conceptual simplicity of the method, makes the GWI a relatively transparent and robust method for attributing anthropogenic  
435 warming and well-suited to providing reliable annual updates.

436

437 Where the GWI method previously separated warming contributions into two components, “anthropogenic” and “natural”, and  
438 independently attributed them, this update further separates and independently attributes contributions within the  
439 Anthropogenic component, adopting the groupings from AR6: “well-mixed greenhouse gases”, “other human forcings” and  
440 “natural forcings”. The climate response model used to estimate (pre-regression) warming from radiative forcing is updated  
441 from the AR5 Impulse Response model (AR5-IR; from AR5 Chapter 8 Supplement (Myhre et al., 2013b)) used in Haustein et  
442 al. (2017) to the Finite-amplitude Impulse Response model (FaIR; Leach et al., 2021; Smith et al., 2018b; Millar et al., 2017),  
443 which was used in SR1.5 and AR6; climate response uncertainty is included by using around 30 sets of parameters that  
444 correspond to FaIR emulating the CMIP6 ensemble, as provided in Leach et al. (2021). The updated historical ERF input to  
445 FaIR is given in Sect. 5, with uncertainty accounted for using a representative 1000-member probabilistic ensemble. Observed  
446 GMST and its uncertainty are provided by the 200-member ensemble of the annually updated HadCRUT5 (Morice et al., 2021;  
447 see Sect. 7). Uncertainty from internal variability is accounted for by using between 100-200 realisations of internal variability  
448 sampled from the CMIP6 piControl simulations (Nicholls et al., 2021). Since some CMIP6 models may have unrealistically  
449 high decadal variability, our estimates of uncertainty may be conservative (Eyring et al., 2021). Here, to partly address this,  
450 piControl timeseries are first filtered, removing simulations that drift by more than 0.15 °C per decade or exhibit unrealistic  
451 variability amplitudes. The parameters for FaIR (given in Leach et al., 2021) are tuned to GSAT outputs from CMIP6; the  
452 outputs from FaIR are not rescaled to account for the difference between GSAT and GMST in the tuning since any rescaling  
453 would be immediately and completely regressed out in the next step of the attribution process; this lack of rescaling is  
454 additionally broadly consistent with the AR6 assessment which concluded with medium confidence that GSAT and GMST  
455 are representative of each other – see Sect. S8.1. In future, FaIR could be re-tuned to GMST estimates from CMIP6 in addition  
456 to GSAT outputs to examine potential differences in the response that cannot be accounted for through a linear rescaling,

though differences in the final attribution results from such a study are expected to be minimal; the regression onto HadCRUT5 provides the strongest constraint.

Producing the GWI ensemble with ~1 billion members is computationally expensive; therefore an ensemble with ~20 million members is randomly subsampled to obtain results, and repeated three times. Uncertainty converges at this scale, and repeat random samplings at the same scale lead to variation in the results of on the order of 0.01 °C.

Compared to Forster et al. (2024), the GWI calculation remains the same, differing only by (i) using ERFs and observed temperatures updated to 2024, and (ii) averaging results across three random ~20 million member sub-samplings instead of ~6 million member sub-samplings (an increase enabled by computing cluster upgrades).

**S8.2.2 Kriging for climate change**

The kriging for climate change method was originally introduced by Ribes et al. (2021), and subsequently extended in Qasmi and Ribes (2022), to attribute past warming and constrain temperature projections over the 21st century. This statistical method is very similar to ensemble Kalman filtering or kriging. In the original publication (Ribes et al., 2021), a subset of 22 CMIP6 models was considered. For each of them, a statistical procedure was applied to estimate the warming induced by GHG, ANT (temporal smoothing procedure) or NAT (using an Energy Balance Model) forcings, respectively. This subset of models was subsequently used to form an a priori distribution (in a Bayesian sense) of past attributable warming. Then the posterior distribution of past attributable warming given observations was derived. This application was based on HadCRUT4-CW GMST observations (Cowtan and Way, 2014), inflated by 6% to account for the assessment at that time of stronger warming of GSAT relative to GMST.

Results from this calculation were quoted in Eyring et al. (2021). The update made here uses the same subset of 22 CMIP6 models. However, HadCRUT5 observations are used, instead of previous datasets, over an extended 1850-2024 period. Consistent with the AR6 assessment about GMST to GSAT warming ratio, no scaling correction is applied; i.e. the global mean value from HadCRUT5 is assumed to be representative of GSAT changes (see Sect. S8.1). As it relies on available CMIP6 simulations, this update assumes that the world has followed a SSP2-4.5 pathway since 2015. Emissions in the SSP scenarios are similar in the period up until 2024 and close to those which have occurred (e.g. Chen et al., 2021); therefore this is a reasonable approximation. Future updates with this method will incorporate new observations. In parallel, we will try to replace the CMIP6 models by emulators, thus allowing the latest available estimates of radiative forcings to be considered, instead of the SSP2-4.5 scenario.

### S8.2.3 Regularized optimal fingerprinting

Optimal fingerprinting is the name given to optimal regression-based approaches to attribution, in which observed anomalies are regressed onto the simulated response to individual forcings from climate models, with the regression coefficients used to infer attributable contributions to observed changes (e.g. Allen and Stott, 2003; Eyring et al., 2021). Ribes et al. (2013) proposed an improved version of the standard total least squares regression, known as regularised optimal fingerprinting, which exhibited improved accuracy in perfect model tests. Gillett et al. (2021) applied this approach to regress observed 5-year mean observed GMST onto the simulated response to individual forcings from the DAMIP simulations (Gillett et al., 2016) of 13 CMIP6 models. In order to ensure a like-for-like comparison, Gillett et al. (2021) regressed observations of GMST, derived from gridded non-infilled near-surface air temperature over land and sea ice, and sea surface temperature over oceans, onto GMST derived from CMIP6 model output in the same way (Cowtan et al., 2015). However, since globally complete GSAT is usually used in the climate impact literature which served as a basis for global warming goals, Gillett et al. (2021) used regression coefficients to infer attributable warming in globally complete GSAT.

Gillett et al. (2021) used CMIP6 DAMIP simulations which generally finished in 2020 and therefore cannot directly be used to infer attributable warming in subsequent years. However, some modelling centres ran single-forcing DAMIP simulations into the future under the SSP2-4.5 scenario (Gillett et al., 2016). Data from concatenated historical and ssp245, hist-nat and ssp245-nat, and hist-GHG and ssp245-GHG were taken from CanESM5 (50, 10, 10), IPSL-CM6A-LR (11, 10, 6) and MIROC6 (3, 50, 50), where numbers in brackets indicate the respective ensemble sizes. Our approach assumes that observed drivers have evolved as in the SSP2-4.5 scenario over the period since 2015, which is a reasonable assumption to the present (e.g. Chen et al., 2021). As in Gillett et al. (2021), internal variability was estimated from intra-ensemble anomalies. Whereas the Gillett et al. (2021) results assessed by Eyring et al. (2021) were based on HadCRUT4, this dataset is no longer being updated, and therefore we use the non-infilled version of HadCRUT5 here (Morice et al., 2021). As shown by Gillett et al. (2021), using HadCRUT5 in place of HadCRUT4 results in a 7% increase in the best estimate of anthropogenic warming for 2010-2019. Gillett et al. (2021) regressed 34 5-year means of GMST over the period 1850-2019 onto simulated GMST over the same period. Here we extend the analysis using 35 5-year means, with the latter based on observations from January 2020 to December 2024 and the model output masked in the same way. In order to be consistent with the Global Warming Index and kriging for climate change approaches described above, and for comparison with GMST observations, we primarily report attributable warming in globally complete GMST here, rather than GSAT (see Sect. S8.1). Calculated anthropogenic warming in GSAT in 2010-2019 computed using HadCRUT5 with this approach of 1.16 (1.04-1.29) °C can be compared with the same quantity reported in Gillett et al. (2021) (their Supplementary Table 1) of 1.18 (1.09-1.27) °C, indicating good consistency.

518 The method described above is easily updatable into the future using the same set of simulations, simply by updating  
 519 observations to a later date and masking model output accordingly. As in the KCC method, a caveat to this approach is that it  
 520 relies on SSP2-4.5 simulations from which actual anthropogenic forcing might be expected to gradually diverge and from  
 521 which actual natural forcing could rapidly diverge, for example, were a major volcanic eruption to occur.

522  
 523 **Table S4 Estimates of global mean surface air temperature (GSAT) warming attributable to multiple influences (in °C) relative to**  
 524 **the 1850–1900 baseline period. Values are given as the median, with the 5-95 percentile range in brackets, provided to 0.01°C**  
 525 **precision. GSAT results here are only provided for regularised optimal fingerprinting (ROF) because the GSAT results for the other**  
 526 **attribution methods (the Global Warming Index (GWI) and kriging for climate change (KCC)) are identical to the GMST results**  
 527 **for those methods.**

| variable                               | 2010-2019<br>(decade average) | 2014-2023<br>(decade average) | 2017<br>(trend-based)  | 2023<br>(trend-based)  |
|----------------------------------------|-------------------------------|-------------------------------|------------------------|------------------------|
| <i>Human-induced</i>                   | 1.18 (1.05 to 1.32)           | 1.35 (1.19 to 1.50)           | 1.22 (1.09 to 1.36)    | 1.51 (1.33 to 1.69)    |
| <i>Well-mixed<br/>greenhouse gases</i> | 1.46 (1.25 to 1.68)           | 1.60 (1.37 to 1.84)           | 1.51 (1.29 to 1.74)    | 1.72 (1.47 to 1.98)    |
| <i>Other human<br/>forcings</i>        | -0.26 (-0.46 to -0.07)        | -0.25 (-0.44 to -0.06)        | -0.27 (-0.48 to -0.07) | -0.23 (-0.41 to -0.05) |
| <i>Natural</i>                         | 0.02 (-0.02 to 0.05)          | 0.01 (-0.03 to 0.05)          | 0.02 (-0.02 to 0.05)   | 0.01 (-0.04 to 0.05)   |

528  
 529 **S8.3 Results from each Attribution Method**  
 530 Results for each attribution method, including headline results and timeseries, are available in csv form in the Climate Indicator  
 531 repository: <https://github.com/ClimateIndicator/anthropogenic-warming-assessment/>.  
 532

533 **Table S5 Estimates of global mean surface temperature (GMST) warming attributable to multiple influences (in °C) relative to the**  
 534 **1850–1900 baseline period, provided for each warming attribution method and the overall multi-method assessment. Values for**  
 535 **individual attribution methods are given as the median, with the 5-95 percentile range in brackets, provided to 0.01 °C precision.**  
 536 **Values for the assessment are calculated as defined in Sect. S8.4 and given as best estimates with likely ranges in brackets.**

| Variable                                   | Method            | 2010-2019<br>(decade<br>average) | 2015-2024<br>(decade<br>average) | 2017<br>(single<br>year) | 2024<br>(single<br>year) | 2017<br>(trend-<br>based) | 2024<br>(trend-<br>based) |
|--------------------------------------------|-------------------|----------------------------------|----------------------------------|--------------------------|--------------------------|---------------------------|---------------------------|
| <i>Human-<br/>induced</i>                  | <i>GW</i>         | 1.07 (0.95 to 1.17)              | 1.19 (1.07 to 1.30)              | 1.13 (1.01 to 1.24)      | 1.30 (1.16 to 1.43)      | 1.11 (1.00 to 1.22)       | 1.31 (1.17 to 1.43)       |
|                                            | <i>KCC</i>        | 1.06 (0.93 to 1.19)              | 1.20 (1.05 to 1.34)              | 1.13 (0.99 to 1.26)      | 1.32 (1.16 to 1.48)      | 1.12 (0.98 to 1.25)       | 1.32 (1.16 to 1.47)       |
|                                            | <i>ROF</i>        | 1.13 (1.00 to 1.25)              | 1.28 (1.13 to 1.43)              | 1.20 (1.04 to 1.35)      | 1.50 (1.19 to 1.80)      | 1.16 (1.03 to 1.30)       | 1.44 (1.27 to 1.61)       |
|                                            | <i>Assessment</i> | 1.09 (0.9 to 1.3)                | 1.22 (1.0 to 1.5)                | 1.15 (0.9 to 1.4)        | 1.37 (1.1 to 1.8)        | 1.13 (0.9 to 1.3)         | 1.36 (1.1 to 1.7)         |
| <i>Well-mixed<br/>greenhouse<br/>gases</i> | <i>GW</i>         | 1.29 (1.04 to 1.54)              | 1.39 (1.12 to 1.66)              | 1.34 (1.08 to 1.60)      | 1.48 (1.20 to 1.78)      | 1.33 (1.07 to 1.60)       | 1.48 (1.19 to 1.77)       |
|                                            | <i>KCC</i>        | 1.50 (1.17 to 1.80)              | 1.61 (1.25 to 1.95)              | 1.56 (1.21 to 1.88)      | 1.72 (1.33 to 2.08)      | 1.56 (1.21 to 1.88)       | 1.72 (1.33 to 2.08)       |
|                                            | <i>ROF</i>        | 1.41 (1.20 to 1.61)              | 1.53 (1.31 to 1.76)              | 1.47 (1.24 to 1.69)      | 1.66 (1.41 to 1.92)      | 1.45 (1.24 to 1.67)       | 1.65 (1.41 to 1.89)       |
|                                            | <i>Assessment</i> | 1.40 (1.0 to 1.9)                | 1.51 (1.1 to 2.0)                | 1.45 (1.0 to 1.9)        | 1.62 (1.1 to 2.1)        | 1.45 (1.0 to 1.9)         | 1.62 (1.1 to 2.1)         |
| <i>Other<br/>human<br/>forcings</i>        | <i>GW</i>         | -0.22 (-0.46 to -0.00)           | -0.19 (-0.44 to 0.02)            | -0.20 (-0.45 to 0.01)    | -0.17 (-0.46 to 0.04)    | -0.22 (-0.46 to 0.01)     | -0.17 (-0.43 to 0.05)     |
|                                            | <i>KCC</i>        | -0.43 (-0.72 to -0.14)           | -0.42 (-0.72 to -0.11)           | -0.43 (-0.72 to -0.13)   | -0.40 (-0.71 to -0.08)   | -0.43 (-0.72 to -0.13)    | -0.40 (-0.72 to -0.08)    |
|                                            | <i>ROF</i>        | -0.26 (-0.45 to -0.07)           | -0.24 (-0.43 to -0.06)           | -0.25 (-0.46 to -0.05)   | -0.19 (-0.42 to 0.04)    | -0.27 (-0.47 to -0.07)    | -0.22 (-0.40 to -0.05)    |
|                                            | <i>Assessment</i> | -0.30 (-0.8 to 0.0)              | -0.28 (-0.8 to 0.1)              | -0.29 (-0.8 to 0.1)      | -0.25 (-0.8 to 0.1)      | -0.31 (-0.8 to 0.1)       | -0.26 (-0.8 to 0.1)       |
| <i>Natural</i>                             | <i>GW</i>         | 0.08 (0.02 to 0.13)              | 0.08 (0.02 to 0.14)              | 0.08 (0.02 to 0.14)      | 0.09 (0.02 to 0.16)      | 0.08 (0.02 to 0.14)       | 0.08 (0.02 to 0.14)       |
|                                            | <i>KCC</i>        | 0.06 (0.04 to 0.08)              | 0.05 (0.04 to 0.07)              | 0.06 (0.04 to 0.08)      | 0.04 (0.03 to 0.06)      | 0.06 (0.04 to 0.08)       | 0.04 (0.03 to 0.06)       |
|                                            | <i>ROF</i>        | 0.02 (-0.02 to 0.05)             | 0.01 (-0.03 to 0.05)             | 0.01 (-0.03 to 0.05)     | 0.00 (-0.04 to 0.05)     | 0.02 (-0.02 to 0.05)      | 0.01 (-0.04 to 0.05)      |
|                                            | <i>Assessment</i> | 0.05 (-0.1 to 0.2)               | 0.05 (-0.1 to 0.2)               | 0.05 (-0.1 to 0.2)       | 0.04 (-0.1 to 0.2)       | 0.05 (-0.1 to 0.2)        | 0.04 (-0.1 to 0.2)        |

537

538

539

## Validation of updated lines of evidence for assessing contributions to observed warming

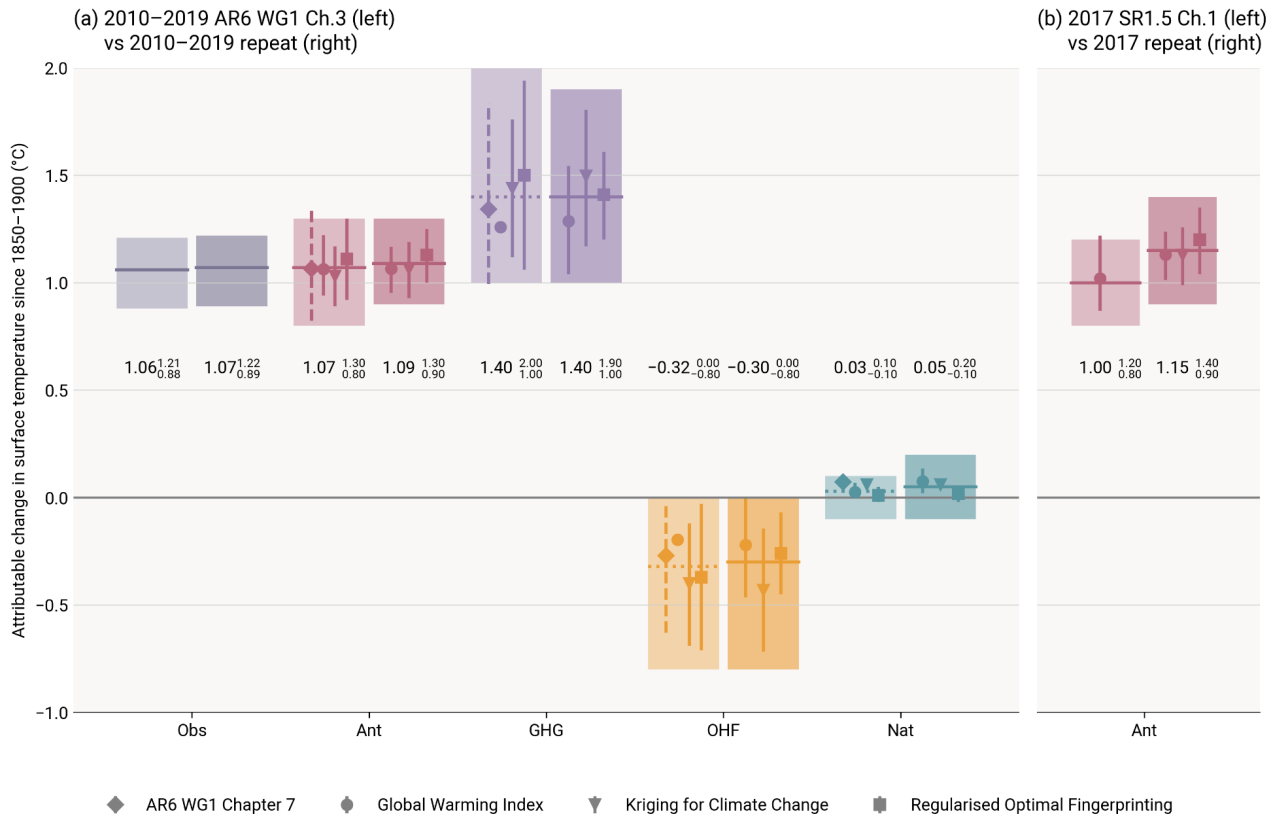

**Figure S7 Assessed contributions to observed warming and supporting lines of evidence; see AR6 WG1 Fig. 3.8.** The shaded bands show the assessed *likely* ranges of temperature change, relative to the 1850–1900 baseline, attributable to total anthropogenic influence (Ant), well-mixed greenhouse gases (GHGs), other human forcings (OHFs), and natural forcings (Nat). The left of each pair of bands depicts the results quoted from AR6, and the right of each pair of bands depicts a repeat calculation for the same period as the IPCC assessment, using the revised datasets and methods, to validate the updated assessment of attributable warming. Panel (a) presents decade-average warming as used in AR6, with results quoted from AR6 WG1 Chapter 3 on the left and the repeat assessment on the right. The solid horizontal bar in each band shows the best estimate for each warming component; if no best estimate was provided, it was retrospectively calculated using the AR6 method and depicted using a horizontal dotted line to facilitate comparison. In AR6, Global Warming Index results were reported as GMST, kriging for climate change results were calculated as GMST and scaled by 1.06 for reporting as GSAT, and regularised optimal fingerprinting was reported as GSAT; for the repeat, all methods are reported in terms of GMST (see Sect. S8.1 for discussion). Panel (b) presents single-year warming as used in SR1.5, with results quoted from SR1.5 Chapter 1 on the left (which was based only on the Global Warming Index) and the repeat assessment on the right, which now includes all of the attribution methods and the multi-method assessment approach used in AR6, as discussed in Sect. S8.4. Both bars are reported in GMST. No assessment was provided for components other than Ant in SR1.5.

Timeseries for each attribution method used in the assessment of contributions to observed warming

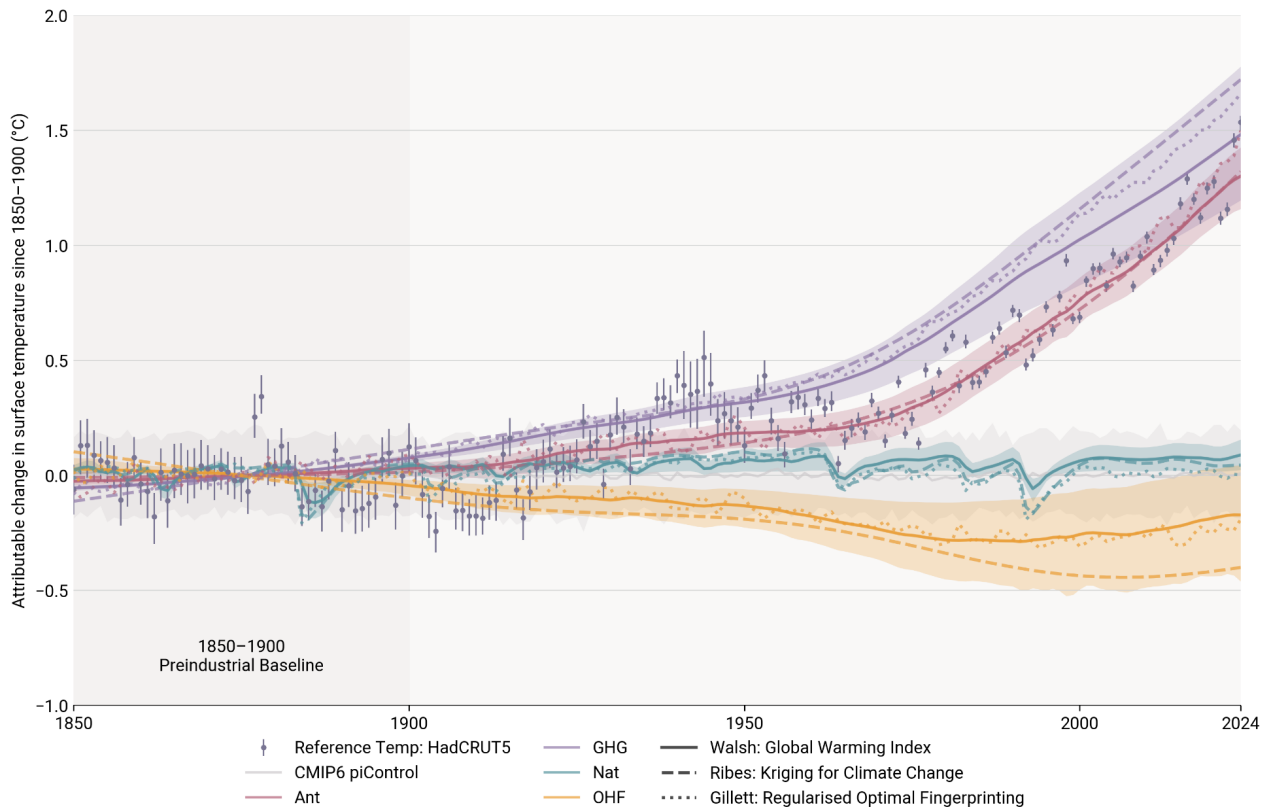

**Figure S8 Time series for each attribution method used in the updated assessment of warming contributions, expressed in terms of global mean surface temperature (GMST). Coloured plumes correspond to warming contributions broken down by natural forcings (Nat), well-mixed greenhouse gases (GHGs) and other human forcings (OHFs). Total human-induced warming (Ant) is therefore the sum of contributions from GHG and OHF. The plume range is given by the 5–95% range of the Global Warming Index (GWI), with the GWI best estimate given by the solid lines. The dashed line presents the best estimate from the kriging for climate change (KCC) method, and the dotted line presents the best estimate from the regularised optimal fingerprinting (ROF) method. GWI and KCC are given as annual values based on infilled GMST from HadCRUT5; ROF is given as annual values of globally complete GMST. The CMIP6 pre-industrial control (piControl) simulations are used as a proxy for multiple samplings of internal variability and are used to account for attribution uncertainty resulting from internal variability in the GWI method (see Sect. S8.2.1).**

Timeseries for each attribution method used in the assessment of contributions to observed warming

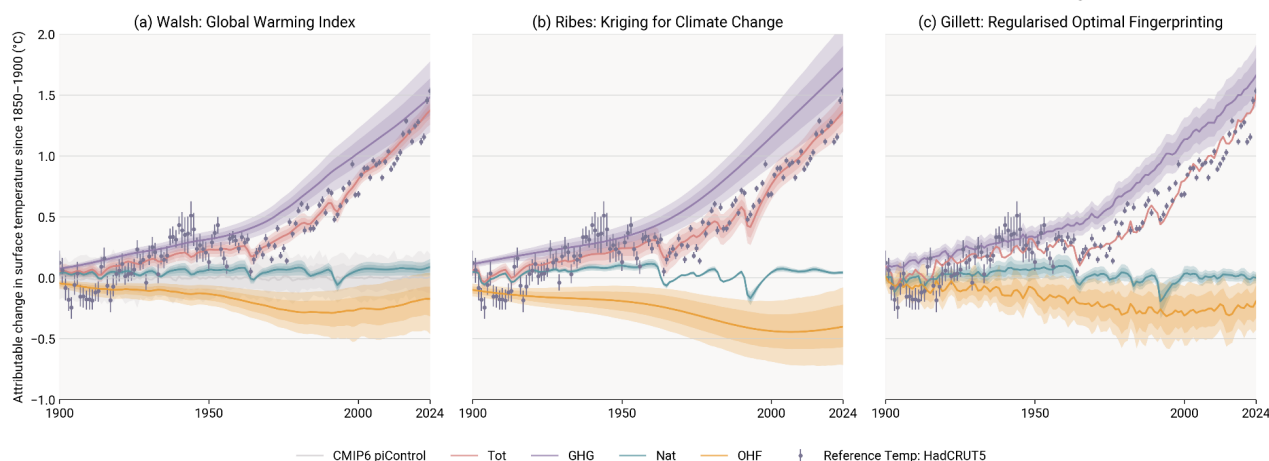

**Figure S9 Time series for each attribution method used in the updated assessment of warming contributions, expressed in terms of global mean surface temperature (GMST). Coloured plumes are given for both 17-83% and 5-95% ranges and correspond to warming contributions to observed warming broken down by natural forcings (Nat), well-mixed greenhouse gases (GHGs) and other human forcings (OHFs). Total warming (Tot) is the total attributable warming and therefore the sum of contributions from GHG, OHF and Nat. Observation data from (infilled) HadCRUT5 are presented with 9-95% uncertainty bars. Panel (a) presents results from the Global Warming Index method (Sect. S8.2.1); the CMIP6 pre-industrial control (piControl) simulations are used as a proxy for multiple samplings of internal variability and used to account for uncertainty in the attribution resulting from internal variability (see Sect. S8.2.1). Panel (b) presents results from the kriging for climate change methods (Sect. S8.2.2). Panel (c) presents results from regularised optimal fingerprinting (Sect. S8.2.3), with the time series for Tot being approximated by the sum of the Ant and Nat medians; note that this is different from GWI and KCC, where Tot is a directly attributed quantity.**



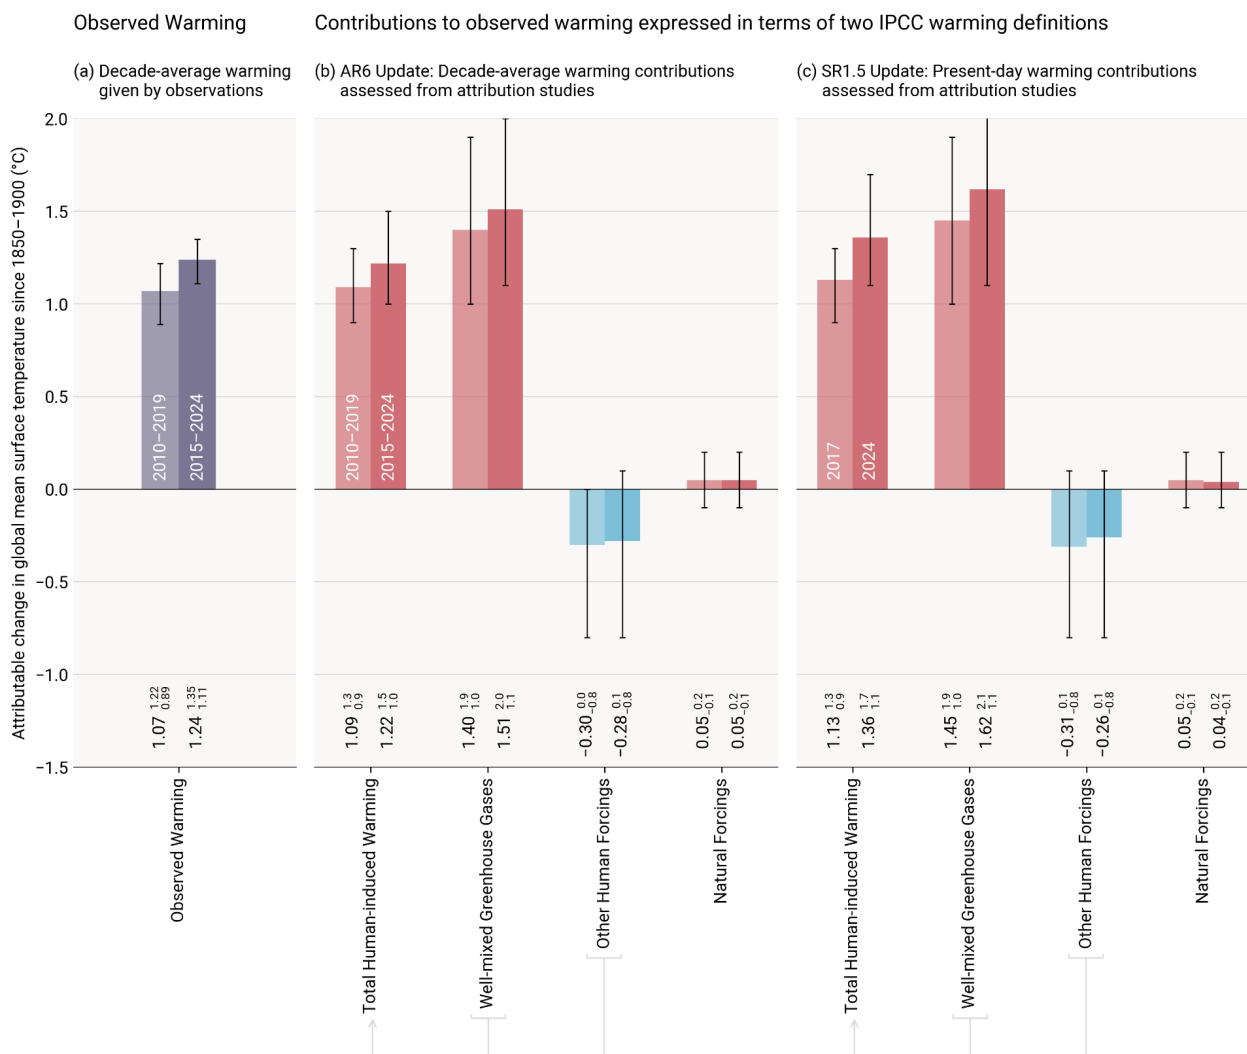

Figure S10 A repeat of Fig. 9 depicting changes to the assessed levels of warming since the sixth assessment cycle. Updated assessed contributions to observed warming relative to 1850–1900; see AR6 WGI SPM.2. Results for all time periods in this figure are calculated using updated datasets and methods. To show how these updates have affected the previous assessments, the 2010–2019 average assessed results repeat the AR6 2010–2019 assessment, and the 2017 assessed results repeat the SR1.5 2017 assessment. The 2015–2024 average and 2024 results are this year’s updated assessments for AR6 and SR1.5, respectively. For each double bar, the lighter and darker shading refers to the earlier and later period, respectively. Panel (a) shows updated observed global warming from Sect. 7, expressed as total global mean surface temperature (GMST), due to both anthropogenic and natural influences. Whiskers give the “very likely” range. Panels (b) and (c) show updated assessed contributions to warming, expressed as global mean surface temperature (GMST), from natural forcings and total human-induced forcings, which in turn consist of contributions from well-mixed greenhouse gases and other human forcings. Whiskers give the “likely” range.

## 590 **S8.4 Updated IPCC assessment approach of attributed global warming**

### 591 **S8.4.1 Updated estimate using the AR6 WGI methodology**

592 Factoring in results from each of the three attribution methods (see Sect. S8.2), AR6 WGI Chap. 3 (Eyring et al., 2021) defined  
593 the *likely* range for each warming component as the smallest 0.1 °C precision range that enveloped the 5th to 95th percentile  
594 ranges of each method. In addition, a best estimate was provided for the human-induced (Ant) warming component, calculated  
595 as the mean of the 50th percentile values for each method. Best estimates were not provided in AR6 for the other components  
596 (well-mixed greenhouse gases (GHGs), other human forcings (OHFs) and natural forcings (Nat)), with their values in AR6  
597 WGI Fig. SPM.2(b) simply being given as the midpoint between the lower and upper bound of the *likely* range and therefore  
598 not directly comparable with the central values given for human-induced and observed warming. In order to make a meaningful  
599 and consistent comparison, and provide insight into interannual changes, an improvement is made in this update: the multi-  
600 method-mean best-estimate approach is extended for all warming components.

601

602 Note that in IPCC assessments, *likely* statements typically correspond to 66–100% probability, whereas *very likely* statements  
603 correspond to 90–100% probability. Despite deriving the overall multi-method uncertainty ranges from the 5–95<sup>th</sup> percentile  
604 ranges for each method, the overall uncertainty was conservatively assessed in AR6 to be *likely* rather than *very likely*, which  
605 noted that the methods may “underestimate the importance of the structural limitations of climate models, which probably do  
606 not represent all possible sources of internal variability; use too simple climate models, which may underestimate the role of  
607 internal variability; or underestimate model uncertainty, especially when using model ensembles of limited size and inter-  
608 dependent models, for example through common errors in forcings across models” (Eyring et al., 2021). We maintain this  
609 choice of *likely* in these updates. The *likely* confidence of the AR6 assessment is also consistent with the *likely* confidence  
610 given in SR1.5 assessment - see Supplement Sect. S8.4.2.

### 611 **S8.4.2 Updated estimate using the SR1.5 methodology applied to the AR6 WGI datasets**

612 While a variety of literature was drawn upon for the assessment of human-induced warming in SR1.5 Chap. 1 (Allen et al.,  
613 2018), only one method, the Global Warming Index (GWI), was used to provide a quantitative assessment of the 2017,  
614 “current”, level of human-induced warming. The latest results for this method were provided by Haustein et al. (2017), who  
615 gave a central estimate for human-induced warming in 2017 of 1.01 °C with a 5 %–95 % range of (0.87 to 1.22 °C). SR1.5  
616 then accounted for methodological uncertainty by rounding this value to 0.1 °C precision for its final assessment of 1.0 °C and

617 assessing the 0.8 to 1.2 °C range as a *likely* range. No assessment of the contributions from other components was provided  
618 due to limitations in the GWI approach at the time.  
619

620 While it is possible to continue the SR1.5 assessment approach of using a single method (GWI) rounded to 0.1 °C precision,  
621 for the purpose of providing annual updates this is insufficient; (i) 0.1 °C precision is too coarse to capture meaningful inter-  
622 annual changes to the level of current warming, (ii) using different selections of methods prevents meaningful comparison  
623 between the results for decadal mean and current single-year warming calculations, and (iii) using the mean of multiple  
624 methods increases the robustness of the results. These points are simultaneously addressed in this update by adopting the latest  
625 multi-method assessment approach, as established in WGI AR6, for both the AR6 decadal mean warming update and the  
626 SR1.5 current single-year warming update. Further, where SR1.5 only provided an assessment for human-induced warming,  
627 updates in available attribution methods since SR1.5 mean that it is now also possible to provide a fully consistent assessment  
628 for all warming components. As with the attribution assessment in SR1.5, this update reports values in Table 6b of the main  
629 paper for the current single-year attributable warming calculated as a simple annual-mean (as discussed in Sect. 8.1), with a  
630 comparison to results for the current single-year attributable warming calculated using the SR1.5 trend-based definition also  
631 provided in Sect. 8.3.  
632

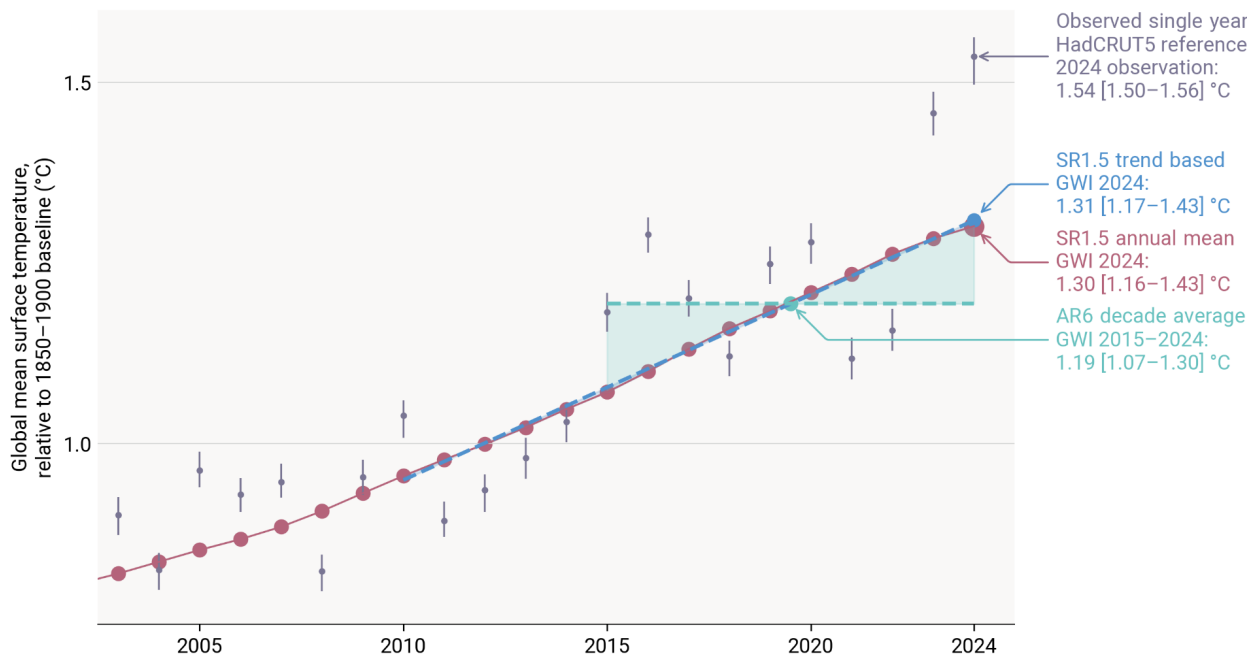

**Figure S11 Anthropogenic warming period definitions adopted in the IPCC sixth assessment cycle.** A single sampled time series of anthropogenic warming is shown in red (in this case from the GWI method – see Sect. S8.2.1). Annual-mean warming is given by the annual values of the GWI time series. The AR6 decade-average warming is given by the average of the 10 most recent annual-mean anthropogenic warming values; this is depicted by the dashed green line with shading between this and the red annual-mean values. The decade-average value for 2015–2023 is given by the green dot. SR1.5 trend-based warming is given by the end point of the linear trend line through the 15 most recent annual-mean anthropogenic warming values; this is depicted by the dashed blue line with shading between this and the red annual-mean values; the trend-based value for 2024 is given by the blue dot. Reference observations of GMST are provided from HadCRUT5, with 5 %–95 % uncertainty range. In practice, the annual-mean, trend-based, and decade-average calculations are applied at the level of the individual ensemble members for each of the three attribution methods; percentiles of those ensemble results provide central estimates and uncertainty ranges for each method, and the multi-method assessment combines those into the final assessment results with uncertainty (as described in Sect. S8.4). For reference, the GWI results for 2024 (provided in Sect. 8.3) are annotated in the figure.

## S8.5 Rate of human-induced warming

### S8.5.1 SR1.5 and AR6 definitions of warming rate

As in previous years' assessments we use recent IPCC assessments' definitions of anthropogenic warming rate. These follow two approaches, both of which rely to some extent on expert judgment. In SR1.5 a number of separate studies were considered,

with each study defining the rate of warming in a separate way. The SR1.5 assessment concluded that the rate of increase of anthropogenic warming in 2017 was 0.2 °C per decade, with a likely range spanning 0.1 °C to 0.3 °C per decade. In AR6 WGI the rate of anthropogenic warming utilised three methods (GWI, KCC, ROF; see definitions in Section S8.2) with the rate defined as the linear trend in the preceding decade of attributed anthropogenic warming. While best-estimate trends reported in AR6 were all higher than in SR1.5's assessment, Eyring et al. (2021) concluded that there was insufficient evidence to change the SR1.5 assessed anthropogenic warming trend in the AR6 WGI report, which therefore remained at 0.2 °C per decade (with a likely range spanning 0.1 °C to 0.3 °C per decade).

## **S8.5.2 Methods**

Following AR6's definition, the rate of warming is defined here as the rolling 10-year linear trend in attributed anthropogenic warming, calculated using ordinary least-squares linear regression. Note that, as with the level of anthropogenic warming, this decadal approach means the rate of warming in a given year is the trend centred on the preceding decade (i.e. it is 5 years out of date). Each of the three attribution methods used to calculate the level of warming are again used here to estimate separate anthropogenic warming rates.

Note that only the GWI methodology relies on the updated historical forcing timeseries presented in Sect. 5, with the other two methods (ROF and KCC) relying on CMIP6 SSP2-4.5 simulations, which are increasingly out of date (see Sect. S8.2). Very recent changes in anthropogenic forcing, for example desulphurisation of shipping fuels or the impact of COVID-19, may therefore not be captured fully in the decade-average trend. Further, the anthropogenic forcing record used for attributing warming contains small contributions from biomass burning in the natural environment, because of difficulty separating this in estimates of anthropogenic aerosol emissions. It is not expected that either of these effects substantially bias the globally-averaged rate of warming estimated here.

## **S8.5.3 Results**

Individual warming rate attributions are revised upwards slightly from previous years (see Table 7 in main text). GWI and KCC methodologies are increased by 0.01 °C/decade for the decade 2015-2024, while ROF is increased by 0.04 °C/decade. This increase in the ROF method's rate principally reflects the fact that the methodology, based on a linear regression of CMIP ensemble member's historical (plus SSP scenario projection to present day) warming onto observed GMST anomaly, is strongly influenced by residual internal variability that remains in the anthropogenic warming signal due to the limitations in

size of the CMIP ensemble, particularly given that the number of CMIP ensemble members which project ensemble members forward to 2024 is reduced compared to those running the full historical experiment.

**Table S6 Estimates of the rate of anthropogenic warming (in °C per decade), provided for each warming attribution method and the overall multi-method assessment. Values for individual attribution methods are calculated as defined in Sect. S8.5 (least squares fit through most recent 10-year period), with best estimates provided as the median, with the 5-95 percentile range in brackets, provided to 0.01 °C precision.**

| Variable                      | Method     | 2010-2019 AR6 Quote | 2010-2019 Repeat         | 2015-2024                |
|-------------------------------|------------|---------------------|--------------------------|--------------------------|
| Rate of human-induced warming | GW1        | 0.23 [0.19 to 0.35] | 0.25 [0.19 to 0.30] GMST | 0.25 [0.20 to 0.30] GMST |
|                               | KCC        | 0.23 [0.19 to 0.29] | 0.26 [0.24 to 0.32] GMST | 0.27 [0.24 to 0.32] GMST |
|                               | ROF        | 0.35 [0.30 to 0.41] | 0.27 [0.17 to 0.38] GMST | 0.42 [0.25 to 0.59] GMST |
|                               | Assessment | 0.2 [0.1 to 0.3]    | 0.26 [0.2 to 0.4]        | 0.27 [0.2 to 0.4]        |

**S9. Remaining carbon budget**

The remaining carbon budget is tabulated below for all decimals between 1.5 °C and 2 °C. In Table S7 we present results directly comparable to Table 8 of the main paper for an expanded range of probabilities and temperature limits. In Table S8 we average the non-CO2 impacts as estimated by MAGICC (as in other tables) and the simple climate model FaIR. We also include an uncertainty of 0.19 °C in the post-net zero warming (ZEC) in Table S8. This corresponds to the “default update” in Lamboll et al. (2023), using the updated values for recent temperatures and emissions.

**Table S7 remaining carbon budgets. This is an expanded version of Table 8 in the main paper.**

| Temperature (°C)                               | Estimated remaining carbon budgets from the beginning of 2025 base year (GtCO <sub>2</sub> ) |     |     |     |     |     |     |
|------------------------------------------------|----------------------------------------------------------------------------------------------|-----|-----|-----|-----|-----|-----|
| Avoidance probability (TCRE uncertainty only): | 10%                                                                                          | 17% | 33% | 50% | 67% | 83% | 90% |

|     |      |      |      |      |     |     |     |
|-----|------|------|------|------|-----|-----|-----|
| 1.5 | 460  | 320  | 200  | 130  | 80  | 30  | 10  |
| 1.6 | 820  | 620  | 420  | 310  | 240 | 160 | 130 |
| 1.7 | 1190 | 910  | 640  | 490  | 390 | 290 | 250 |
| 1.8 | 1550 | 1200 | 860  | 680  | 550 | 430 | 370 |
| 1.9 | 1920 | 1500 | 1090 | 860  | 710 | 560 | 480 |
| 2   | 2290 | 1790 | 1310 | 1050 | 870 | 690 | 600 |

**Table S8 remaining carbon budgets, including uncertainty in ZEC and averaging results from MAGICC and FaIR for non-CO<sub>2</sub> warming.**

| Temperature (°C)                                  | Estimated remaining carbon budgets from the beginning of 2025 base year (GtCO <sub>2</sub> ) |      |      |      |     |      |      |
|---------------------------------------------------|----------------------------------------------------------------------------------------------|------|------|------|-----|------|------|
| Avoidance probability (TCRE and ZEC uncertainty): | 10%                                                                                          | 17%  | 33%  | 50%  | 67% | 83%  | 90%  |
| 1.5                                               | 980                                                                                          | 710  | 400  | 180  | 10  | -220 | -370 |
| 1.6                                               | 1280                                                                                         | 950  | 600  | 360  | 180 | -50  | -180 |
| 1.7                                               | 1580                                                                                         | 1210 | 800  | 550  | 350 | 120  | -20  |
| 1.8                                               | 1910                                                                                         | 1470 | 1010 | 730  | 510 | 280  | 140  |
| 1.9                                               | 2240                                                                                         | 1740 | 1220 | 910  | 680 | 430  | 290  |
| 2                                                 | 2570                                                                                         | 2010 | 1430 | 1090 | 840 | 580  | 440  |

Estimating the remaining carbon budget (RCB) requires an estimate of future non-CO<sub>2</sub> warming. The latter estimate is derived from the emissions trajectories as modelled by internally consistent emissions scenarios. While RCB estimates are for CO<sub>2</sub> emissions only, the consideration of non-CO<sub>2</sub> warming implies that assumptions are also made about reductions in other

anthropogenic forcers (Rogelj and Lamboll, 2024). These reductions have to be kept in mind, as a shortfall in non-CO<sub>2</sub> greenhouse gas emissions would result in a smaller RCB estimate. For instance, as reported in Rogelj and Lamboll (2024), the estimate of RCBs consistent with limiting warming to 1.5 °C assumes a median reduction in CH<sub>4</sub> emissions between 2020 and 2050 of 51% (while the interquartile range across available scenarios is 47–60%), a 22% reduction between 2020 and 2050 in N<sub>2</sub>O emissions (interquartile range: 7–35%), and a 78% reduction between 2020 and 2050 in SO<sub>2</sub> emissions (interquartile range: 74–78%). Assumed reductions consistent with other levels of warming are reproduced from Rogelj and Lamboll (2024) and provided in Table S9. The estimates reported in Table 8 of the main paper are based on the median non-CO<sub>2</sub> emission reductions. Falling short of achieving the assumed non-CO<sub>2</sub> greenhouse gas emissions reductions would further reduce the RCB. Sulphur dioxide emissions are more tightly co-controlled with CO<sub>2</sub> reduction because of the phase-out of unabated fossil fuel combustion and air pollution control measures (Rogelj et al., 2014a, 2014b). A shortfall in their reductions would therefore be less conceivable in a net-zero CO<sub>2</sub> world.

**Table S9 Non-CO<sub>2</sub> reductions implied in Remaining Carbon Budget (RCB) estimates, adapted from Rogelj and Lamboll (2024). Values represent the changes in non-CO<sub>2</sub> emissions between 2020 and 2050 consistent with the RCB estimates for 1.5°C, 1.7°C and 2.0°C. The median changes are the default and marked in light blue. Any deviation from this median assumption results in an increase or decrease of the RCB estimate.**

| Temperature level for which RCB was estimated | Percentile       | Implied non-CO <sub>2</sub> change between 2020 and 2050 [%] |                  |                 |
|-----------------------------------------------|------------------|--------------------------------------------------------------|------------------|-----------------|
|                                               |                  | CH <sub>4</sub>                                              | N <sub>2</sub> O | SO <sub>2</sub> |
| 1.5°C                                         | 10 <sup>th</sup> | -69                                                          | -47              | -80             |
|                                               | 25 <sup>th</sup> | -60                                                          | -35              | -78             |
|                                               | 50 <sup>th</sup> | -51                                                          | -22              | -78             |
|                                               | 75 <sup>th</sup> | -47                                                          | -7               | -74             |
|                                               | 90 <sup>th</sup> | -39                                                          | +2               | -66             |
| 1.7°C                                         | 10 <sup>th</sup> | -62                                                          | -42              | -78             |
|                                               | 25 <sup>th</sup> | -53                                                          | -30              | -76             |
|                                               | 50 <sup>th</sup> | -44                                                          | -18              | -73             |
|                                               | 75 <sup>th</sup> | -39                                                          | -3               | -68             |



|       |                  |     |     |     |
|-------|------------------|-----|-----|-----|
|       | 90 <sup>th</sup> | -31 | +6  | -60 |
| 2.0°C | 10 <sup>th</sup> | -51 | -35 | -75 |
|       | 25 <sup>th</sup> | -43 | -23 | -72 |
|       | 50 <sup>th</sup> | -34 | -11 | -66 |
|       | 75 <sup>th</sup> | -27 | +2  | -59 |
|       | 90 <sup>th</sup> | -20 | +12 | -51 |

**S10. Examples of climate and weather extremes: maximum temperature over land**

**Land average annual maximum temperature (TXx) - Methods**

The choice of datasets for the analysis of land average TXx is based on a trade-off between record length, data availability, near real-time updates, and long-term support. As the indicator averages over all available land grid points, the spatial coverage should be high to obtain a meaningful average, which further limits the choice of datasets. The HadEX3 dataset (Dunn et al., 2020), which is used for Fig. 11.2 in Seneviratne et al. (2021), is static and does not cover years after 2018. We therefore additionally include the Berkeley Earth Surface Temperature dataset (building off Rohde et al., 2013) and the fifth-generation ECMWF atmospheric reanalysis of the global climate (ERA5; Hersbach et al., 2020). Berkeley Earth data currently enable an analysis of annual indices up to 2023, while ERA5 covers the whole of 2024 as it is updated daily with a latency of about 5 d (and the final release occurs after 2–3 months).

For HadEX3, we select the years 1961–2018, to exclude years with insufficient data coverage, and require at least 90 % temporal completeness, thus applying the same criteria as for Fig. 11.2 in Seneviratne et al. (2021). Berkeley Earth provides daily maximum temperatures, and we require more than 99 % data availability for each individual year and grid point, such that years with more than 4 missing days are removed. Based on this criterion, Berkeley Earth covers at least 95 % of the global land area from 1955 onwards. ERA5, on the other hand, has full spatio-temporal coverage by design, and hence the entire currently available period of 1950–2024 is used. The annual maximum temperature is then computed for each grid point, and a global area-weighted average is calculated for all grid points with at least 90 % temporal completeness in the respective available period (1955–2023 and 1961–2018 for Berkeley Earth and HadEX3, while ERA5 is again not affected by this criterion). We thus enforce high data availability to adequately calculate global land averaged TXx across all three datasets,

but their coverage is not identical, which introduces minor deviations in the estimated global land averages. The resulting TXx time series are then computed as anomalies with respect to a baseline period of 1961–1990. Note that the Berkeley Earth daily maximum data has been updated, with changes of several °C for individual grid points and days. These changes partially compensate such that the TXx estimates for individual years differ less than 0.1 °C.

To express the TXx as anomalies with respect to 1850–1900, we add an offset to all three datasets. The offset is based on the Berkeley Earth data and is derived from the linear regression of land mean TXx to the annual mean global mean air temperature over the period 1955–2020. The offset is then calculated as the slope of the linear regression times the global mean temperature difference between the reference periods 1850–1900 and 1961–1990 (see Fig. S12). The updated Berkeley Earth data led to a change in offset of 0.01°C compared to Forster et al. (2024).

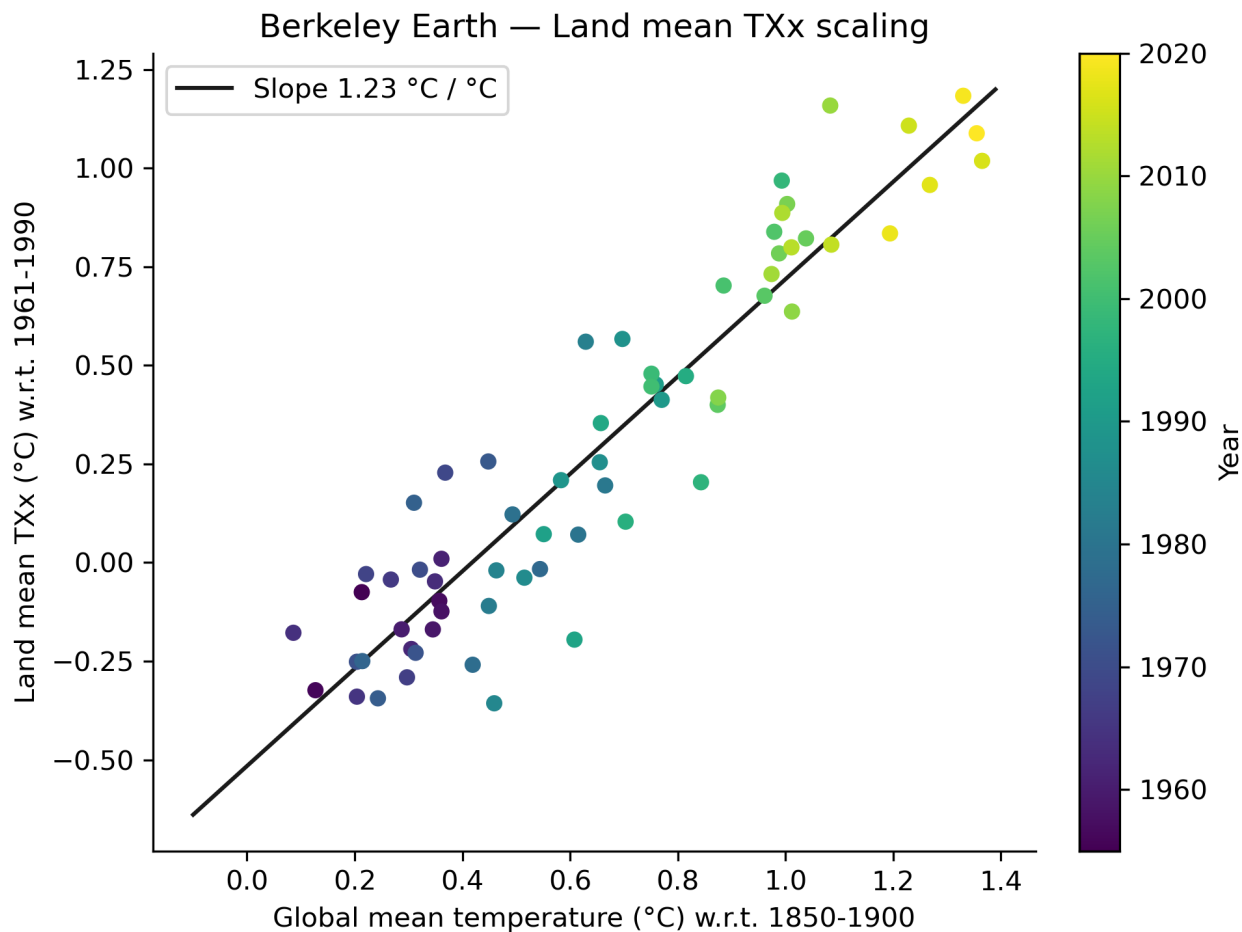

**Figure S12 Calculation of relationship between land mean annual maximum temperature (TXx) and global mean temperature. This is used to determine the TXx offset between 1850–1900 and 1961–1990. A linear regression of TXx as a function of global mean temperature from Berkeley Earth is fitted to data from 1955–2020. The TXx offset of 0.51 °C is then obtained by multiplying the slope of the linear regression (1.23 °C / °C) with the global mean temperature difference between 1850–1900 and 1961–1990 (0.42°C).**

## References

Adusumilli, S., Straneo, F., Hendricks, S., Korosov, A., Lavergne, T., Lawrence, I., Marzeion, B., Otosaka, I., Schweiger, A., Shepherd, A., Slater, D., Slater, T., Timmermanns, M.-L., and Zemp, M.: GCOS EHI 1960-2020 Cryosphere Heat Content, [https://doi.org/10.26050/WDCC/GCOS\\_EHI\\_1960-2020\\_CRHC](https://doi.org/10.26050/WDCC/GCOS_EHI_1960-2020_CRHC), 2022.

Allen, M. R. and Stott, P. A.: Estimating signal amplitudes in optimal fingerprinting, part I: theory, *Climate Dynamics*, 21, 477–491, <https://doi.org/10.1007/s00382-003-0313-9>, 2003.

Allen, M. R., O. P. Dube, W. Solecki, F. Aragón-Durand, W. Cramer, S. Humphreys, M. Kainuma, J. Kala, N. Mahowald, Y. Mulugetta, R. Perez, M. Wairiu, and K. Zickfeld, 2018: Framing and Context. In: *Global Warming of 1.5°C. An IPCC Special Report on the impacts of global warming of 1.5°C above pre-industrial levels and related global greenhouse gas emission pathways, in the context of strengthening the global response to the threat of climate change, sustainable development, and efforts to eradicate poverty* [Masson-Delmotte, V., P. Zhai, H.-O. Pörtner, D. Roberts, J. Skea, P.R. Shukla, A. Pirani, W. Moufouma-Okia, C. Péan, R. Pidcock, S. Connors, J.B.R. Matthews, Y. Chen, X. Zhou, M.I. Gomis, E. Lonnoy, T. Maycock, M. Tignor, and T. Waterfield (eds.)], Cambridge University Press, Cambridge, UK and New York, NY, USA, 49-92, <https://doi.org/10.1017/9781009157940.003>, 2018.

Beusch, L., Gudmundsson, L., and Seneviratne, S. I.: Emulating Earth system model temperatures with MESMER: from global mean temperature trajectories to grid-point-level realizations on land, *Earth Syst. Dynam.*, 11, 139–159, <https://doi.org/10.5194/esd-11-139-2020>, 2020.

Chen, D., M. Rojas, B. H. Samset, K. Cobb, A. Diongue Niang, P. Edwards, S. Emori, S. H. Faria, E. Hawkins, P. Hope, P. Huybrechts, M. Meinshausen, S. K. Mustafa, G.-K. Plattner, and A.-M. Tréguier, 2021: Framing, Context, and Methods. In *Climate Change 2021: The Physical Science Basis. Contribution of Working Group I to the Sixth Assessment Report of the Intergovernmental Panel on Climate Change* [Masson-Delmotte, V., P. Zhai, A. Pirani, S. L. Connors, C. Péan, S. Berger, N. Caud, Y. Chen, L. Goldfarb, M. I. Gomis, M. Huang, K. Leitzell, E. Lonnoy, J. B. R. Matthews, T. K. Maycock, T. Waterfield, O. Yelekçi, R. Yu, and B. Zhou (eds.)]. Cambridge University Press, Cambridge, United Kingdom and New York, NY, USA, pp. 147–286, <https://doi.org/10.1017/9781009157896.003>, 2021.

Cheng, L., Trenberth, K. E., Fasullo, J., Boyer, T., Abraham, J., and Zhu, J.: Improved estimates of ocean heat content from 1960 to 2015, *Sci. Adv.*, 3, e1601545, <https://doi.org/10.1126/sciadv.1601545>, 2017.

Cowtan, K. and Way, R. G.: Coverage bias in the HadCRUT4 temperature series and its impact on recent temperature trends, *Q.J.R. Meteorol. Soc.*, 140, 1935–1944, <https://doi.org/10.1002/qj.2297>, 2014.

Cowtan, K., Hausfather, Z., Hawkins, E., Jacobs, P., Mann, M. E., Miller, S. K., Steinman, B. A., Stolpe, M. B., and Way, R. G.: Robust comparison of climate models with observations using blended land air and ocean sea surface temperatures, *Geophys. Res. Lett.*, 42, 6526–6534, <https://doi.org/10.1002/2015GL064888>, 2015.

Cuesta-Valero, F. J., García-García, A., Beltrami, H., González-Rouco, J. F., and García-Bustamante, E.: Long-term global ground heat flux and continental heat storage from geothermal data, *Clim. Past*, 17, 451–468, <https://doi.org/10.5194/cp-17-451-2021>, 2021.

790 Cuesta-Valero, F. J., Beltrami, H., García-García, A., Krinner, G., Langer, M., MacDougall, A. H., Nitzbon, J., Peng, J., von  
791 Schuckmann, K., Seneviratne, S. I., Smith, N., Thiery, W., Vanderkelen, I., and Wu, T.: Continental heat storage: Contributions  
792 from ground, inland waters, and permafrost thawing, *Earth Syst. Dynam. Discuss.* [preprint], [https://doi.org/10.5194/esd-2022-](https://doi.org/10.5194/esd-2022-32)  
793 32, 2023.

794 Deng, Z., Ciais, P., Tzompa-Sosa, Z. A., Saunio, M., Qiu, C., Tan, C., Sun, T., Ke, P., Cui, Y., Tanaka, K., Lin, X., Thompson,  
795 R. L., Tian, H., Yao, Y., Huang, Y., Lauerwald, R., Jain, A. K., Xu, X., Bastos, A., Sitch, S., Palmer, P. I., Lauvaux, T.,  
796 d'Aspremont, A., Giron, C., Benoit, A., Poulter, B., Chang, J., Petrescu, A. M. R., Davis, S. J., Liu, Z., Grassi, G., Albergel,  
797 C., Tubiello, F. N., Perugini, L., Peters, W., and Chevallier, F.: Comparing national greenhouse gas budgets reported in  
798 UNFCCC inventories against atmospheric inversions, *Earth Syst. Sci. Data*, 14, 1639–1675, [https://doi.org/10.5194/essd-14-](https://doi.org/10.5194/essd-14-1639-2022)  
799 [1639-2022](https://doi.org/10.5194/essd-14-1639-2022), 2022.

800 Dessler, A. E., Schoeberl, M. R., Wang, T., Davis, S. M., Rosenlof, K. H., and Vernier, J.-P.: Variations of stratospheric water  
801 vapor over the past three decades, *J. Geophys. Res.-Atmos.*, 119, 12588-12598, <https://doi.org/10.1002/2014JD021712>, 2014.

802 Dhomse, S. S., Mann, G. W., Antuña Marrero, J. C., Shallcross, S. E., Chipperfield, M. P., Carslaw, K. S., Marshall, L.,  
803 Abraham, N. L., and Johnson, C. E.: Evaluating the simulated radiative forcings, aerosol properties, and stratospheric  
804 warmings from the 1963 Mt Agung, 1982 El Chichón, and 1991 Mt Pinatubo volcanic aerosol clouds, *Atmos. Chem. Phys.*,  
805 20, 13627–13654, <https://doi.org/10.5194/acp-20-13627-2020>, 2020.

806 Domingues, C. M., Church, J. A., White, N. J., Gleckler, P. J., Wijffels, S. E., Barker, P. M., and Dunn, J. R.: Improved  
807 estimates of upper-ocean warming and multi-decadal sea-level rise, *Nature*, 453, 1090–1093,  
808 <https://doi.org/10.1038/nature07080>, 2008.

809 Dunn, R. J. H., Alexander, L. V., Donat, M. G., Zhang, X., Bador, M., Herold, N., et al. Development of an updated global land  
810 in situ-based dataset of temperature and precipitation extremes: HadEX3, *J. Geophys. Res.-Atmos.*, 125, e2019JD032263,  
811 <https://doi.org/10.1029/2019JD032263R>, 2020.

812 Dutton, G. S., B. D. Hall, S. A. Montzka, J. D. Nance, S. D. Clingan, K. M. Petersen, Combined Atmospheric  
813 Chlorofluorocarbon-12 Dry Air Mole Fractions from the NOAA GML Halocarbons Sampling Network, 1977-2024, Version:  
814 2024-03-07, <https://doi.org/10.15138/PJ63-H440>, 2024.

815 Etminan, M., Myhre, G., Highwood, E. J., and Shine, K. P.: Radiative forcing of carbon dioxide, methane, and nitrous oxide:  
816 A significant revision of the methane radiative forcing, *Geophys. Res. Lett.*, 43, 12614-12623,  
817 <https://doi.org/10.1002/2016GL071930>, 2016.

818 Eyring, V., N. P. Gillett, K. M. Achuta Rao, R. Barimalala, M. Barreiro Parrillo, N. Bellouin, C. Cassou, P. J. Durack, Y.  
819 Kosaka, S. McGregor, S. Min, O. Morgenstern, and Y. Sun: Human Influence on the Climate System. In *Climate Change*  
820 2021: The Physical Science Basis. Contribution of Working Group I to the Sixth Assessment Report of the Intergovernmental

821 Panel on Climate Change[Masson-Delmotte, V., P. Zhai, A. Pirani, S.L. Connors, C. Péan, S. Berger, N. Caud, Y. Chen, L.  
 822 Goldfarb, M.I. Gomis, M. Huang, K. Leitzell, E. Lonnoy, J.B.R. Matthews, T.K. Maycock, T. Waterfield, O. Yelekçi, R. Yu,  
 823 and B. Zhou (eds.)]. Cambridge University Press, Cambridge, United Kingdom and New York, NY, USA, pp. 423–552,  
 824 <http://doi:10.1017/9781009157896.005>, 2021.

825 Forster, P., T. Storelvmo, K. Armour, W. Collins, J.-L. Dufresne, D. Frame, D.J. Lunt, T. Mauritsen, M.D. Palmer, M.  
 826 Watanabe, M. Wild, and H. Zhang, 2021: The Earth’s Energy Budget, Climate Feedbacks, and Climate Sensitivity. In Climate  
 827 Change 2021: The Physical Science Basis. Contribution of Working Group I to the Sixth Assessment Report of the  
 828 Intergovernmental Panel on Climate Change [Masson-Delmotte, V., P. Zhai, A. Pirani, S.L. Connors, C. Péan, S. Berger, N.  
 829 Caud, Y. Chen, L. Goldfarb, M.I. Gomis, M. Huang, K. Leitzell, E. Lonnoy, J.B.R. Matthews, T.K. Maycock, T. Waterfield,  
 830 O. Yelekçi, R. Yu, and B. Zhou (eds.)]. Cambridge University Press, Cambridge, United Kingdom and New York, NY, USA,  
 831 pp. 923–1054, <https://doi.org/10.1017/9781009157896.009>, 2021.

832 Forster, P. M., Smith, C. J., Walsh, T., Lamb, W. F., Lamboll, R., Hauser, M., Ribes, A., Rosen, D., Gillett, N., Palmer, M.  
 833 D., Rogelj, J., von Schuckmann, K., Seneviratne, S. I., Trewin, B., Zhang, X., Allen, M., Andrew, R., Birt, A., Borger, A.,  
 834 Boyer, T., Broersma, J. A., Cheng, L., Dentener, F., Friedlingstein, P., Gutiérrez, J. M., Gütschow, J., Hall, B., Ishii, M.,  
 835 Jenkins, S., Lan, X., Lee, J.-Y., Morice, C., Kadow, C., Kennedy, J., Killick, R., Minx, J. C., Naik, V., Peters, G. P., Pirani,  
 836 A., Pongratz, J., Schleussner, C.-F., Szopa, S., Thorne, P., Rohde, R., Rojas Corradi, M., Schumacher, D., Vose, R., Zickfeld,  
 837 K., Masson-Delmotte, V., and Zhai, P.: Indicators of Global Climate Change 2022: annual update of large-scale indicators of  
 838 the state of the climate system and human influence, *Earth Syst. Sci. Data*, 15, 2295–2327, [https://doi.org/10.5194/essd-15-](https://doi.org/10.5194/essd-15-2295-2023)  
 839 [2295-2023](https://doi.org/10.5194/essd-15-2295-2023), 2023.

840 Friedlingstein, P., O’Sullivan, M., Jones, M. W., Andrew, R. M., Hauck, J., Landschützer, P., Le Quéré, C., Li, H., Luijkx, I.  
 841 T., Olsen, A., Peters, G. P., Peters, W., Pongratz, J., Schwingshackl, C., Sitch, S., Canadell, J. G., Ciais, P., Jackson, R. B.,  
 842 Alin, S. R., Arneeth, A., Arora, V., Bates, N. R., Becker, M., Bellouin, N., Berghoff, C. F., Bittig, H. C., Bopp, L., Cadule, P.,  
 843 Campbell, K., Chamberlain, M. A., Chandra, N., Chevallier, F., Chini, L. P., Colligan, T., Decayeux, J., Djeutchouang, L. M.,  
 844 Dou, X., Duran Rojas, C., Enyo, K., Evans, W., Fay, A. R., Feely, R. A., Ford, D. J., Foster, A., Gasser, T., Gehlen, M.,  
 845 Gkritzalis, T., Grassi, G., Gregor, L., Gruber, N., Gürses, Ö., Harris, I., Hefner, M., Heinke, J., Hurtt, G. C., Iida, Y., Ilyina,  
 846 T., Jacobson, A. R., Jain, A. K., Jarníková, T., Jersild, A., Jiang, F., Jin, Z., Kato, E., Keeling, R. F., Klein Goldewijk, K.,  
 847 Knauer, J., Korsbakken, J. I., Lan, X., Lauvset, S. K., Lefèvre, N., Liu, Z., Liu, J., Ma, L., Maksyutov, S., Marland, G., Mayot,  
 848 N., McGuire, P. C., Metzl, N., Monacchi, N. M., Morgan, E. J., Nakaoka, S.-I., Neill, C., Niwa, Y., Nützel, T., Olivier, L., Ono,  
 849 T., Palmer, P. I., Pierrot, D., Qin, Z., Resplandy, L., Roobaert, A., Rosan, T. M., Rödenbeck, C., Schwinger, J., Smallman, T.  
 850 L., Smith, S. M., Sospedra-Alfonso, R., Steinhoff, T., Sun, Q., Sutton, A. J., Séférian, R., Takao, S., Tatebe, H., Tian, H.,  
 851 Tilbrook, B., Torres, O., Tourigny, E., Tsujino, H., Tubiello, F., van der Werf, G., Wanninkhof, R., Wang, X., Yang, D., Yang,

852 X., Yu, Z., Yuan, W., Yue, X., Zaehe, S., Zeng, N., and Zeng, J.: Global Carbon Budget 2024, *Earth Syst. Sci. Data*, 17, 965–  
853 1039, <https://doi.org/10.5194/essd-17-965-2025>, 2025.

854 Fueglistaler, S. and Haynes, P. H.: Control of interannual and longer-term variability of stratospheric water vapor, *J. Geophys.*  
855 *Res.*, 110, D24108, <https://doi.org/10.1029/2005JD006019>, 2005.

856 Gettelman, A., Christensen, M. A., Diamond, M. S., Gryspeerdt, E., Manshausen, P., Sieir, P., Watson-Parris, D., Yang, M.,  
857 Yoshioka, M., and Yuan, T.: Has Reducing Ship Emissions Brought Forward Global Warming?, *Geophys. Res. Lett.*, 2024.

858 Gillett, N. P., Shiogama, H., Funke, B., Hegerl, G., Knutti, R., Matthes, K., Santer, B. D., Stone, D., and Tebaldi, C.: The  
859 Detection and Attribution Model Intercomparison Project (DAMIP v1.0) contribution to CMIP6, *Geosci. Model. Dev.*, 9,  
860 3685–3697, <https://doi.org/10.5194/gmd-9-3685-2016>, 2016.

861 Gillett, N.P., Kirchmeier-Young, M., Ribes, A., Shiogama, H., Hegerl, G.C., Knutti, R., Gastineau, G., John, J.G., Li, L.,  
862 Nazarenko, L., Rosenbloom, N., Seland, Ø., Wu, T., Yukimoto, S., and Ziehn, T.: Constraining human contributions to  
863 observed warming since the pre-industrial period, *Nat. Clim. Chang.*, 11, 207–212, [https://doi.org/10.1038/s41558-020-00965-](https://doi.org/10.1038/s41558-020-00965-9)  
864 [9](https://doi.org/10.1038/s41558-020-00965-9), 2021.

865 Good, S. A., Martin, M. J., and Rayner, N. A.: EN4: Quality controlled ocean temperature and salinity profiles and monthly  
866 objective analyses with uncertainty estimates, THE EN4 DATA SET, *J. Geophys. Res.-Oceans*, 118, 6704–6716,  
867 <https://doi.org/10.1002/2013JC009067>, 2013.

868 Grassi, G., Federici, S., Abad-Vinas, R., Korosuo, A., and Rossi, S.: LULUCF data based on National GHG inventories  
869 (NGHGI DB), Zenodo [data set], <https://doi.org/10.5281/zenodo.7190601>, 2022.

870 Gulev, S. K., P. W. Thorne, J. Ahn, F. J. Dentener, C. M. Domingues, S. Gerland, D. Gong, D. S. Kaufman, H. C. Nnamchi,  
871 J. Quaas, J.A. Rivera, S. Sathyendranath, S.L. Smith, B. Trewin, K. von Schuckmann, and R. S. Vose: Changing State of the  
872 Climate System. In *Climate Change 2021: The Physical Science Basis. Contribution of Working Group I to the Sixth*  
873 *Assessment Report of the Intergovernmental Panel on Climate Change*[Masson-Delmotte, V., P. Zhai, A. Pirani, S.L. Connors,  
874 C. Péan, S. Berger, N. Caud, Y. Chen, L. Goldfarb, M.I. Gomis, M. Huang, K. Leitzell, E. Lonnoy, J.B.R. Matthews, T.K.  
875 Maycock, T. Waterfield, O. Yelekçi, R. Yu, and B. Zhou (eds.)]. Cambridge University Press, Cambridge, United Kingdom  
876 and New York, NY, USA, pp. 287–422, <https://doi.org/10.1017/9781009157896.004>, 2021.

877 Granier, C., Darras, S., Denier van der Gon, H., Doubalova, J., Elguindi, N., Galle, B., Gauss, M., Guevara, M., Jalkanen, J.-  
878 P., Kuenen, J., Liousse, C., Quack, B., Simpson, D., and Sindelarova, K.: The Copernicus Atmosphere Monitoring Service  
879 global and regional emissions (April 2019 version), <https://doi.org/10.24380/D0BN-KX16>, n.d, 2019.

880 Gütschow, J., and Busch, D., and Pflüger, M.: The PRIMAP-hist national historical emissions time series v2.6.1 (1750-2023)  
881 (2.6.1), Zenodo [data set] <https://doi.org/10.5281/zenodo.15016289>, 2025.

882 Jalkanen, J.-P., Johansson, L., Kukkonen, J., Brink, A., Kalli, J., and Stipa, T.: Extension of an assessment model of ship traffic  
883 exhaust emissions for particulate matter and carbon monoxide, *Atmospheric Chemistry and Physics*, 12, 2641–2659,  
884 <https://doi.org/10.5194/acp-12-2641-2012>, 2012.

885 Jalkanen, J.-P., Johansson, L., and Kukkonen, J.: A comprehensive inventory of ship traffic exhaust emissions in the European  
886 sea areas in 2011, *Atmos. Chem. Phys.*, 16, 71–84, <https://doi.org/10.5194/acp-16-71-2016>, 2016.

887 Johansson, L., Jalkanen, J.-P., and Kukkonen, J.: Global assessment of shipping emissions in 2015 on a high spatial and  
888 temporal resolution, *Atmospheric Environment*, 167, 403–415, <https://doi.org/10.1016/j.atmosenv.2017.08.042>, 2017.

889 Haustein, K., Allen, M. R., Forster, P. M., Otto, F. E. L., Mitchell, D. M., Matthews, H. D., and Frame, D. J.: A real-time  
890 Global Warming Index, *Sci Rep*, 7, 15417, <https://doi.org/10.1038/s41598-017-14828-5>, 2017.

891 Hersbach H., Bell, B., Berrisford, P. et al.: The ERA5 global reanalysis, *Quat. Jour. R. Met. Soc.*, 146:1999–2049,  
892 <https://doi.org/10.1002/qj.3803>, 2020.

893 Hodnebrog, Ø., Myhre, G., Kramer, R. J., Shine, K. P., Andrews, T., Faluvegi, G., Kasoar, M., Kirkevåg, A., Lamarque, J.-F.,  
894 Mülmenstädt, J., Olivie, D., Samset, B. H., Shindell, D., Smith, C. J., Takemura, T., and Voulgarakis, A.: The effect of rapid  
895 adjustments to halocarbons and N<sub>2</sub>O on radiative forcing, *npj Clim. Atmos. Sci.*, 3, 43, [https://doi.org/10.1038/s41612-020-](https://doi.org/10.1038/s41612-020-00150-x)  
896 [00150-x](https://doi.org/10.1038/s41612-020-00150-x), 2020a.

897 Hodnebrog, Ø., Aamaas, B., Fuglestad, J. S., Marston, G., Myhre, G., Nielsen, C. J., et al.: Updated global warming potentials  
898 and radiative efficiencies of halocarbons and other weak atmospheric absorbers, *Rev. Geophys.*, 58, e2019RG000691,  
899 <https://doi.org/10.1029/2019RG000691>, 2020b.

900 Hurst, D. F., Oltmans, S. J., Vömel, H., Rosenlof, K. H., Davis, S. M., Ray, E. A., Hall, E. G., and Jordan, A. F.: Stratospheric  
901 water vapor trends over Boulder, Colorado: Analysis of the 30 year Boulder record, *J. Geophys. Res.-Atmos.*, 116,  
902 <https://doi.org/10.1029/2010JD015065>, 2011.

903 Huang, B., Yin, X., Menne, M., Vose, R., and Zhang, H.M.: Improvements to the land surface air temperature reconstruction  
904 in NOAA GlobalTemp: An artificial neural network approach, *Artificial Intelligence for the Earth Systems*, 1, 3,  
905 <https://journals.ametsoc.org/view/journals/aies/1/4/AIES-D-22-0032.1.xml>, 2020.

906 IATA: Global Outlook for Air Transport: Times of Turbulence, IATA, [http://www.iata.org/en/iata-](http://www.iata.org/en/iata-repository/publications/economic-reports/global-outlook-for-air-transport-december-2024/)  
907 [repository/publications/economic-reports/global-outlook-for-air-transport-december-2024/](http://www.iata.org/en/iata-repository/publications/economic-reports/global-outlook-for-air-transport-december-2024/), 2024.

908 IEA: World oil statistics (Edition 2024), IEA Oil Information Statistics (database), <https://doi.org/10.1787/558987b9-en>, 2024  
909 (accessed on 24 April 2024).

910 Ishii, M., Fukuda, Y., Hirahara, S., Yasui, S., Suzuki, T., and Sato, K.: Accuracy of Global Upper Ocean Heat Content  
911 Estimation Expected from Present Observational Data Sets, *SOLA*, 13, 163–167, <https://doi.org/10.2151/sola.2017-030>, 2017.



Jenkins, S., Smith, C., Allen, M., and Grainger, R.: Tonga eruption increases chance of temporary surface temperature anomaly above 1.5 °C, *Nature Clim. Chang.*, 13, 127–129, <https://doi.org/10.1038/s41558-022-01568-2>, 2023.

Joshi, M. M. and Jones, G. S.: The climatic effects of the direct injection of water vapour into the stratosphere by large volcanic eruptions, *Atmos. Chem. Phys.*, 9, 6109–6118, <https://doi.org/10.5194/acp-9-6109-2009>, 2009.

Jungclaus, J. H., Bard, E., Baroni, M., Braconnot, P., Cao, J., Chini, L. P., Egorova, T., Evans, M., González-Rouco, J. F., Goosse, H., Hurtt, G. C., Joos, F., Kaplan, J. O., Khodri, M., Klein Goldewijk, K., Krivova, N., LeGrande, A. N., Lorenz, S. J., Luterbacher, J., Man, W., Maycock, A. C., Meinshausen, M., Moberg, A., Muscheler, R., Nehrbass-Ahles, C., Otto-Bliesner, B. I., Phipps, S. J., Pongratz, J., Rozanov, E., Schmidt, G. A., Schmidt, H., Schmutz, W., Schurer, A., Shapiro, A. I., Sigl, M., Smerdon, J. E., Solanki, S. K., Timmreck, C., Toohey, M., Usoskin, I. G., Wagner, S., Wu, C.-J., Yeo, K. L., Zanchettin, D., Zhang, Q., and Zorita, E.: The PMIP4 contribution to CMIP6 – Part 3: The last millennium, scientific objective, and experimental design for the PMIP4 past1000 simulations, *Geosci. Model Dev.*, 10, 4005–4033, <https://doi.org/10.5194/gmd-10-4005-2017>, 2017.

Kadow, C., Hall, D. M., and Ulbrich, U.: Artificial intelligence reconstructs missing climate information, *Nat. Geosci.*, 13, 408–413, <https://doi.org/10.1038/s41561-020-0582-5>, 2020.

Keeble, J., Hassler, B., Banerjee, A., Checa-Garcia, R., Chiodo, G., Davis, S., Eyring, V., Griffiths, P. T., Morgenstern, O., Nowack, P., Zeng, G., Zhang, J., Bodeker, G., Burrows, S., Cameron-Smith, P., Cugnet, D., Danek, C., Deushi, M., Horowitz, L. W., Kubin, A., Li, L., Lohmann, G., Michou, M., Mills, M. J., Nabat, P., Olivié, D., Park, S., Seland, Ø., Stoll, J., Wieners, K.-H., and Wu, T.: Evaluating stratospheric ozone and water vapour changes in CMIP6 models from 1850 to 2100, *Atmos. Chem. Phys.*, 21, 5015–5061, <https://doi.org/10.5194/acp-21-5015-2021>, 2021.

Kovilakam, M., Thomason, L. W., Ernest, N., Rieger, L., Bourassa, A., and Millán, L.: The Global Space-based Stratospheric Aerosol Climatology (version 2.0): 1979–2018, *Earth Syst. Sci. Data*, 12, 2607–2634, <https://doi.org/10.5194/essd-12-2607-2020>, 2020.

Lan, X., Tans, P. and Thoning, K.W.: Trends in globally-averaged CO<sub>2</sub> determined from NOAA Global Monitoring Laboratory measurements, Version Monday, 14-Apr-2025 09:08:57 MDT <https://doi.org/10.15138/9N0H-ZH07>, 2025.

Leach, N. J., Jenkins, S., Nicholls, Z., Smith, C. J., Lynch, J., Cain, M., Walsh, T., Wu, B., Tsutsui, J., and Allen, M. R.: FaIRv2.0.0: a generalized impulse response model for climate uncertainty and future scenario exploration, *Geosci. Model Dev.*, 14, 3007–3036, <https://doi.org/10.5194/gmd-14-3007-2021>, 2021.

Lee, D. S., Fahey, D. W., Skowron, A., Allen, M. R., Burkhardt, U., Chen, Q., Doherty, S. J., Freeman, S., Forster, P. M., Fuglestad, J., Gettelman, A., León, R. R. D., Lim, L. L., Lund, M. T., Millar, R. J., Owen, B., Penner, J. E., Pitari, G., Prather, M. J., Sausen, R., and Wilcox, L. J.: The contribution of global aviation to anthropogenic climate forcing for 2000 to 2018, *Atmos. Environ.*, 244, 117834, <https://doi.org/10.1016/j.atmosenv.2020.117834>, 2021.

943 Lee, J.-Y., J. Marotzke, G. Bala, L. Cao, S. Corti, J.P. Dunne, F. Engelbrecht, E. Fischer, J.C. Fyfe, C. Jones, A. Maycock, J.  
 944 Mutemi, O. Ndiaye, S. Panickal, and T. Zhou: Future Global Climate: Scenario-Based Projections and Near-Term Information.  
 945 In *Climate Change 2021: The Physical Science Basis. Contribution of Working Group I to the Sixth Assessment Report of the*  
 946 *Intergovernmental Panel on Climate Change*[Masson-Delmotte, V., P. Zhai, A. Pirani, S.L. Connors, C. Péan, S. Berger, N.  
 947 Caud, Y. Chen, L. Goldfarb, M.I. Gomis, M. Huang, K. Leitzell, E. Lonnoy, J.B.R. Matthews, T.K. Maycock, T. Waterfield,  
 948 O. Yelekçi, R. Yu, and B. Zhou (eds.)]. Cambridge University Press, Cambridge, United Kingdom and New York, NY, USA,  
 949 pp. 553–672, <https://doi.org/10.1017/9781009157896.006>, 2021.

950 Lee, H., K. Calvin, D. Dasgupta, G. Krinner, A. Mukherji, P. Thorne, C. Trisos, J. Romero, P. Aldunce, K. Barrett, G. Blanco,  
 951 W.W.L. Cheung, S.L. Connors, F. Denton, A. Diongue-Niang, D. Dodman, M. Garschagen, O. Geden, B. Hayward, C. Jones,  
 952 F. Jotzo, T. Krug, R. Lasco, J.-Y. Lee, V. Masson-Delmotte, M. Meinshausen, K. Mintenbeck, A. Mokssit, F.E.L. Otto, M.  
 953 Pathak, A. Pirani, E. Poloczanska, H.-O. Pörtner, A. Revi, D.C. Roberts, J. Roy, A.C. Ruane, J. Skea, P.R. Shukla, R. Slade,  
 954 A. Slangen, Y. Sokona, A.A. Sörensson, M. Tignor, D. van Vuuren, Y.-M. Wei, H. Winkler, P. Zhai, and Z. Zommers:  
 955 *Synthesis Report of the IPCC Sixth Assessment Report (AR6): Summary for Policymakers. Intergovernmental Panel on*  
 956 *Climate Change* [accepted], available at <https://www.ipcc.ch/report/ar6/syr/>, 2023.

957 Lenssen, N. J. L., Schmidt, G. A., Hansen, J. E., Menne, M. J., Persin, A., Ruedy, R., and Zyss, D.: Improvements in the  
 958 GISTEMP Uncertainty Model, *J. Geophys. Res.-Atmos.*, 124, 6307–6326, <https://doi.org/10.1029/2018JD029522>, 2019.

959 Levitus, S., Antonov, J. I., Boyer, T. P., Baranova, O. K., Garcia, H. E., Locarnini, R. A., Mishonov, A. V., Reagan, J. R.,  
 960 Seidov, D., Yarosh, E. S., and Zweng, M. M.: World ocean heat content and thermosteric sea level change (0–2000 m), 1955–  
 961 2010, *Geophys. Res. Lett.*, 39, <https://doi.org/10.1029/2012GL051106>, 2012.

962 Matthes, K., Funke, B., Andersson, M. E., Barnard, L., Beer, J., Charbonneau, P., Clilverd, M. A., Dudok de Wit, T.,  
 963 Haberreiter, M., Hendry, A., Jackman, C. H., Kretzschmar, M., Kruschke, T., Kunze, M., Langematz, U., Marsh, D. R.,  
 964 Maycock, A. C., Misios, S., Rodger, C. J., Scaife, A. A., Seppälä, A., Shangguan, M., Sinnhuber, M., Tourpali, K., Usoskin,  
 965 I., van de Kamp, M., Verronen, P. T., and Versick, S.: Solar forcing for CMIP6 (v3.2), *Geosci. Model Dev.*, 10, 2247–2302,  
 966 <https://doi.org/10.5194/gmd-10-2247-2017>, 2017.

967 Meinshausen, M., Nicholls, Z. R. J., Lewis, J., Gidden, M. J., Vogel, E., Freund, M., Beyerle, U., Gessner, C., Nauels, A.,  
 968 Bauer, N., Canadell, J. G., Daniel, J. S., John, A., Krummel, P. B., Luderer, G., Meinshausen, N., Montzka, S. A., Rayner, P.  
 969 J., Reimann, S., Smith, S. J., van den Berg, M., Velders, G. J. M., Vollmer, M. K., and Wang, R. H. J.: The shared socio-  
 970 economic pathway (SSP) greenhouse gas concentrations and their extensions to 2500, *Geosci. Model Dev.*, 13, 3571–3605,  
 971 <https://doi.org/10.5194/gmd-13-3571-2020>, 2020.

972 Millán, L., Santee, M. L., Lambert, A., Livesey, N. J., Werner, F., Schwartz, M. J., Pumphrey, H. C., Manney, G. L., Wang,  
 973 Y., Su, H., Wu, L., Read, W. G., and Froidevaux, L.: The Hunga Tonga-Hunga Ha’apai Hydration of the Stratosphere,  
 974 *Geophys. Res. Lett.*, 49, e2022GL099381, <https://doi.org/10.1029/2022GL099381>, 2022.

975 Millar, R. J., Nicholls, Z. R., Friedlingstein, P., and Allen, M. R.: A modified impulse-response representation of the global  
 976 near-surface air temperature and atmospheric concentration response to carbon dioxide emissions, *Atmos. Chem. Phys.*, 17,  
 977 7213–7228, <https://doi.org/10.5194/acp-17-7213-2017>, 2017.

978 Minx, J. C., Lamb, W. F., Andrew, R. M., Canadell, J. G., Crippa, M., Döbbeling, N., Forster, P. M., Guizzardi, D., Olivier,  
 979 J., Peters, G. P., Pongratz, J., Reisinger, A., Rigby, M., Saunio, M., Smith, S. J., Solazzo, E., and Tian, H.: A comprehensive  
 980 and synthetic dataset for global, regional, and national greenhouse gas emissions by sector 1970–2018 with an extension to  
 981 2019, *Earth Syst. Sci. Data*, 13, 5213–5252, <https://doi.org/10.5194/essd-13-5213-2021>, 2021.

982 Morice, C. P., Kennedy, J. J., Rayner, N. A., Winn, J. P., Hogan, E., Killick, R. E., Dunn, R. J. H., Osborn, T. J., Jones, P. D.,  
 983 and Simpson, I. R.: An Updated Assessment of Near-Surface Temperature Change From 1850: The HadCRUT5 Data Set, *J.*  
 984 *Geophys. Res.-Atmos.*, 126, e2019JD032361, <https://doi.org/10.1029/2019JD032361>, 2021.

985 Myhre, G., Samset, B. H., Schulz, M., Balkanski, Y., Bauer, S., Berntsen, T. K., Bian, H., Bellouin, N., Chin, M., Diehl, T.,  
 986 Easter, R. C., Feichter, J., Ghan, S. J., Hauglustaine, D., Iversen, T., Kinne, S., Kirkevåg, A., Lamarque, J.-F., Lin, G., Liu, X.,  
 987 Lund, M. T., Luo, G., Ma, X., van Noije, T., Penner, J. E., Rasch, P. J., Ruiz, A., Seland, Ø., Skeie, R. B., Stier, P., Takemura,  
 988 T., Tsigaridis, K., Wang, P., Wang, Z., Xu, L., Yu, H., Yu, F., Yoon, J.-H., Zhang, K., Zhang, H., and Zhou, C.: Radiative  
 989 forcing of the direct aerosol effect from AeroCom Phase II simulations, *Atmos. Chem. Phys.*, 13, 1853–1877,  
 990 <https://doi.org/10.5194/acp-13-1853-2013>, 2013a.

991 Myhre, G., D. Shindell, F.-M. Bréon, W. Collins, J. Fuglestad, J. Huang, D. Koch, J.-F. Lamarque, D. Lee, B. Mendoza, T.  
 992 Nakajima, A. Robock, G. Stephens, T. Takemura and H. Zhang: Anthropogenic and Natural Radiative Forcing. In: *Climate*  
 993 *Change 2013: The Physical Science Basis. Contribution of Working Group I to the Fifth Assessment Report of the*  
 994 *Intergovernmental Panel on Climate Change*, edited by Stocker, T.F., D. Qin, G.-K. Plattner, M. Tignor, S.K. Allen, J.  
 995 Boschung, A. Nauels, Y. Xia, V. Bex and P.M. Midgley (eds.]. Cambridge University Press, Cambridge, United Kingdom  
 996 and New York, NY, USA, <https://doi.org/10.1017/CBO9781107415324.018>, 2013b.

997 Nicholls Z., Lewis J., Makin M., et al. Regionally aggregated, stitched and de-drifted CMIP-climate data, processed with  
 998 netCDF-SCM v2.0.0. *Geosci Data J.*, 8, 154–198, <https://doi.org/10.1002/gdj3.113>, 2021.

999 Nitzbon, J., Krinner, G., Langer, M.: GCOS EHI 1960–2020 Permafrost Heat Content, World Data Center for Climate (WDCC)  
 1000 at DKRZ, [https://doi.org/10.26050/WDCC/GCOS\\_EHI\\_1960-2020\\_PHC](https://doi.org/10.26050/WDCC/GCOS_EHI_1960-2020_PHC), 2022b.

1001 Otto, F. E. L., Frame, D. J., Otto, A., and Allen, M. R.: Embracing uncertainty in climate change policy, *Nature Clim. Chang.*,  
 1002 5, 917–920, <https://doi.org/10.1038/nclimate2716>, 2015.

1003 Palmer, M. D., Domingues, C. M., Slangen, A. B. A., and Dias, F. B.: An ensemble approach to quantify global mean sea-  
 1004 level rise over the 20th century from tide gauge reconstructions, *Environ. Res. Lett.*, 16, 044043, [https://doi.org/10.1088/1748-](https://doi.org/10.1088/1748-9326/abdaec)  
 1005 [9326/abdaec](https://doi.org/10.1088/1748-9326/abdaec), 2021.

1006 Purkey, S.G. and Johnson, G.C., Warming of Global Abyssal and Deep Southern Ocean Waters between the 1990s and 2000s:  
 1007 Contributions to Global Heat and Sea Level Rise Budgets, *J. Climate*, 23, 6336–6351,  
 1008 <https://doi.org/10.1175/2010JCLI3682.1>, 2010.

1009 Prinn, R. G., Weiss, R. F., Arduini, J., Arnold, T., DeWitt, H. L., Fraser, P. J., Ganesan, A. L., Gasore, J., Harth, C. M.,  
 1010 Hermansen, O., Kim, J., Krummel, P. B., Li, S., Loh, Z. M., Lunder, C. R., Maione, M., Manning, A. J., Miller, B. R.,  
 1011 Mitrevski, B., Mühle, J., O'Doherty, S., Park, S., Reimann, S., Rigby, M., Saito, T., Salameh, P. K., Schmidt, R., Simmonds,  
 1012 P. G., Steele, L. P., Vollmer, M. K., Wang, R. H., Yao, B., Yokouchi, Y., Young, D., and Zhou, L.: History of chemically and  
 1013 radiatively important atmospheric gases from the Advanced Global Atmospheric Gases Experiment (AGAGE), *Earth Syst.*  
 1014 *Sci. Data*, 10, 985–1018, <https://doi.org/10.5194/essd-10-985-2018>, 2018.

1015 Qasmi, S. and Ribes, A.: Reducing uncertainty in local temperature projections, *Sci. Adv.*, 8, eabo6872,  
 1016 <https://doi.org/10.1126/sciadv.abo6872>, 2022.

1017 Riahi, K., Schaeffer, J. Arango, K. Calvin, C. Guivarch, T. Hasegawa, K. Jiang, E. Kriegler, R. Matthews, G.P. Peters, A. Rao,  
 1018 S. Robertson, A.M. Sebbit, J. Steinberger, M. Tavoni, D.P. van Vuuren, 2022: Mitigation pathways compatible with long-term  
 1019 goals. In IPCC, 2022: Climate Change 2022: Mitigation of Climate Change. Contribution of Working Group III to the Sixth  
 1020 Assessment Report of the Intergovernmental Panel on Climate Change [P.R. Shukla, J. Skea, R. Slade, A. Al Khourdajie, R.  
 1021 van Diemen, D. McCollum, M. Pathak, S. Some, P. Vyas, R. Fradera, M. Belkacemi, A. Hasija, G. Lisboa, S. Luz, J. Malley,  
 1022 (eds.)]. Cambridge University Press, Cambridge, UK and New York, NY, USA, <https://doi.org/10.1017/9781009157926.005>,  
 1023 2022.

1024 Ribes, A., Planton, S., and Terray, L.: Application of regularised optimal fingerprinting to attribution. Part I: method, properties  
 1025 and idealised analysis, *Clim. Dyn.*, 41, 2817–2836, <https://doi.org/10.1007/s00382-013-1735-7>, 2013.

1026 Ribes, A., Qasmi, S., and Gillett, N. P.: Making climate projections conditional on historical observations, *Sci. Adv.*, 7,  
 1027 eabc0671, <https://doi.org/10.1126/sciadv.abc0671>, 2021.

1028 Richardson, M., Cowtan, K., and Millar, R. J.: Global temperature definition affects achievement of long-term climate goals,  
 1029 *Environ. Res. Lett.*, 13, 054004, <https://doi.org/10.1088/1748-9326/aab305>, 2018.

1030 Rogelj, J., Schaeffer, M., Meinshausen, M., Shindell, D. T., Hare, W., Klimont, Z., Velders, G. J., Amann, M., and  
 1031 Schellnhuber, H. J.: Disentangling the effects of CO<sub>2</sub> and short-lived climate forcer mitigation, *Proc. Natl. Acad. Sci. USA*,  
 1032 111 (46), 16325–16330, <https://doi.org/10.1073/pnas.1415631111>, 2014a.

1033 Rogelj, J., D. Shindell, K. Jiang, S. Fifita, P. Forster, V. Ginzburg, C. Handa, H. Kheshgi, S. Kobayashi, E. Kriegler, L.  
1034 Mundaca, R. Séférian, and M. V. Vilariño: Mitigation Pathways Compatible with 1.5°C in the Context of Sustainable  
1035 Development. In: *Global Warming of 1.5°C. An IPCC Special Report on the impacts of global warming of 1.5°C above pre-*  
1036 *industrial levels and related global greenhouse gas emission pathways, in the context of strengthening the global response to*  
1037 *the threat of climate change, sustainable development, and efforts to eradicate poverty* [Masson-Delmotte, V., P. Zhai, H.-O.  
1038 Pörtner, D. Roberts, J. Skea, P.R. Shukla, A. Pirani, W. Moufouma-Okia, C. Péan, R. Pidcock, S. Connors, J. B. R. Matthews,  
1039 Y. Chen, X. Zhou, M. I. Gomis, E. Lonnoy, T. Maycock, M. Tignor, and T. Waterfield (eds.)]. Cambridge University Press,  
1040 Cambridge, UK and New York, NY, USA, pp. 93-174, <https://doi.org/10.1017/9781009157940.004>, 2018.

1041 Rogelj, J., Rao, S., McCollum, D. L., Pachauri, S., Klimont, Z., Krey, V., and Riahi, K: Air-pollution emission ranges  
1042 consistent with the representative concentration pathways, *Nature Clim. Chang.*, 4 (6), 446–450,  
1043 <https://doi.org/10.1038/nclimate2178>, 2014b.

1044 Rogelj, J., Lamboll, R.D.: Substantial reductions in non-CO<sub>2</sub> greenhouse gas emissions reductions implied by IPCC estimates  
1045 of the remaining carbon budget. *Communications Earth Environ* 5, 35. <https://doi.org/10.1038/s43247-023-01168-8>, 2024.

1046 Rohde, R., Muller, R., Jacobsen, R., Perlmutter, S., Rosenfeld, A., Wurtele, J., Curry, J., Wickham, C., and Mosher, S.:  
1047 Berkeley Earth temperature averaging process, *Geoinfor. Geostat.: An Overview*, 1, [https://doi.org/10.4172/2327-](https://doi.org/10.4172/2327-4581.1000103)  
1048 [4581.1000103](https://doi.org/10.4172/2327-4581.1000103), 2013.

1049 Rohde, R. A. and Hausfather, Z.: The Berkeley Earth Land/Ocean Temperature Record, *Earth Sys. Sci. Data*, 12, 3469–3479,  
1050 <https://doi.org/10.5194/essd-12-3469-2020>, 2020.

1051 Sellitto, P., Podglajen, A., Belhadji, R., Boichu, M., Carboni, E., Cuesta, J., Duchamp, C., Kloss, C., Siddans, R., Bègue, N.,  
1052 Blarel, L., Jegou, F., Khaykin, S., Renard, J.B., Legras, B.: The unexpected radiative impact of the Hunga Tonga eruption of  
1053 15th January 2022, *Commun. Earth. Environ.*, 3, 288, <https://doi.org/10.1038/s43247-022-00618-z>, 2022.

1054 von Schuckmann, K., Cheng, L., Palmer, M. D., Hansen, J., Tassone, C., Aich, V., Adusumilli, S., Beltrami, H., Boyer, T.,  
1055 Cuesta-Valero, F. J., Desbruyères, D., Domingues, C., García-García, A., Gentine, P., Gilson, J., Gorfer, M., Haimberger, L.,  
1056 Ishii, M., Johnson, G. C., Killick, R., King, B. A., Kirchengast, G., Kolodziejczyk, N., Lyman, J., Marzeion, B., Mayer, M.,  
1057 Monier, M., Monselesan, D. P., Purkey, S., Roemmich, D., Schweiger, A., Seneviratne, S. I., Shepherd, A., Slater, D. A.,  
1058 Steiner, A. K., Straneo, F., Timmermans, M.-L., and Wijffels, S. E.: Heat stored in the Earth system: where does the energy  
1059 go?, *Earth Syst. Sci. Data*, 12, 2013–2041, <https://doi.org/10.5194/essd-12-2013-2020>, 2020.

1060 von Schuckmann, K., Minière, A., Gues, F., Cuesta-Valero, F. J., Kirchengast, G., Adusumilli, S., Straneo, F., Ablain, M.,  
1061 Allan, R. P., Barker, P. M., Beltrami, H., Blazquez, A., Boyer, T., Cheng, L., Church, J., Desbruyeres, D., Dolman, H.,  
1062 Domingues, C. M., García-García, A., Giglio, D., Gilson, J. E., Gorfer, M., Haimberger, L., Hakuba, M. Z., Hendricks, S.,  
1063 Hosoda, S., Johnson, G. C., Killick, R., King, B., Kolodziejczyk, N., Korosov, A., Krinner, G., Kuusela, M., Landerer, F. W.,

1064 Langer, M., Lavergne, T., Lawrence, I., Li, Y., Lyman, J., Marti, F., Marzeion, B., Mayer, M., MacDougall, A. H., McDougall,  
 1065 T., Monselesan, D. P., Nitzbon, J., Otosaka, I., Peng, J., Purkey, S., Roemmich, D., Sato, K., Sato, K., Savita, A., Schweiger,  
 1066 A., Shepherd, A., Seneviratne, S. I., Simons, L., Slater, D. A., Slater, T., Steiner, A. K., Suga, T., Szekely, T., Thiery, W.,  
 1067 Timmermans, M.-L., Vanderkelen, I., Wjiffels, S. E., Wu, T., and Zemp, M.: Heat stored in the Earth system 1960–2020:  
 1068 where does the energy go?, *Earth System Science Data*, 15, 1675–1709, <https://doi.org/10.5194/essd-15-1675-2023>, 2023.  
 1069 Sigl, M., Toohey, M., McConnell, J. R., Cole-Dai, J., and Severi, M.: Volcanic stratospheric sulfur injections and aerosol  
 1070 optical depth during the Holocene (past 11\,500 years) from a bipolar ice-core array, *Earth Syst. Sci. Data*, 14, 3167–3196,  
 1071 <https://doi.org/10.5194/essd-14-3167-2022>, 2022.  
 1072 Skeie, R. B., Myhre, G., Hodnebrog, Ø., Cameron-Smith, P. J., Deushi, M., Hegglin, M. I., Horowitz, L. W., Kramer, R. J.,  
 1073 Michou, M., Mills, M. J., Olivié, D. J. L., Connor, F. M. O., Paynter, D., Samset, B. H., Sellar, A., Shindell, D., Takemura, T.,  
 1074 Tilmes, S., and Wu, T.: Historical total ozone radiative forcing derived from CMIP6 simulations, *npj Clim. Atmos. Sci.*, 3, 32,  
 1075 <https://doi.org/10.1038/s41612-020-00131-0>, 2020.  
 1076 Smith, C. J., Kramer, R. J., Myhre, G., Forster, P. M., Soden, B. J., Andrews, T., Boucher, O., Faluvegi, G., Fläschner, D.,  
 1077 Hodnebrog, Ø., Kasoar, M., Kharin, V., Kirkevåg, A., Lamarque, J.-F., Mülmenstädt, J., Olivié, D., Richardson, T., Samset,  
 1078 B. H., Shindell, D., Stier, P., Takemura, T., Voulgarakis, A., and Watson-Parris, D.: Understanding Rapid Adjustments to  
 1079 Diverse Forcing Agents, *Geophys. Res. Lett.*, 45, 12,023–12,031, <https://doi.org/10.1029/2018GL079826>, 2018a.  
 1080 Smith, C. J., Forster, P. M., Allen, M., Leach, N., Millar, R. J., Passerello, G. A., and Regayre, L. A.: FAIR v1.3: A simple  
 1081 emissions-based impulse response and carbon cycle model, *Geoscientific Model Development*, 11, 2273–2297,  
 1082 <https://doi.org/10.5194/gmd-11-2273-2018>, 2018b.  
 1083 Smith, C. J., Harris, G. R., Palmer, M. D., Bellouin, N., Collins, W., Myhre, G., Schulz, M., Golaz, J.-C., Ringer, M.,  
 1084 Storelvmo, T., and Forster, P. M.: Energy Budget Constraints on the Time History of Aerosol Forcing and Climate Sensitivity,  
 1085 *Journal of Geophysical Research: Atmospheres*, 126, e2020JD033622, <https://doi.org/10.1029/2020JD033622>, 2021a.  
 1086 Smith, C., Nicholls, Z. R. J., Armour, K., Collins, W., Forster, P., Meinshausen, M., Palmer, M. D., and Watanabe, M.: The  
 1087 Earth’s Energy Budget, Climate Feedbacks, and Climate Sensitivity Supplementary Material, in: *Climate Change 2021: The*  
 1088 *Physical Science Basis. Contribution of Working Group I to the Sixth Assessment Report of the Intergovernmental Panel on*  
 1089 *Climate Change*, edited by: Masson-Delmotte, V., Zhai, P., Pirani, A., Connors, S. L., Péan, C., Berger, S., Caud, N., Chen,  
 1090 Y., Goldfarb, L., Gomis, M. I., Huang, M., Leitzell, K., Lonnoy, E., Matthews, J. B. R., Maycock, T. K., Waterfield, T.,  
 1091 Yelekçi, O., Yu, R., and Zhou, B., 2021b.  
 1092 Smith, C., Cummins, D. P., Fredriksen, H.-B., Nicholls, Z., Meinshausen, M., Allen, M., Jenkins, S., Leach, N., Mathison, C.,  
 1093 and Partanen, A.-I.: fair-calibrate v1.4.1: calibration, constraining, and validation of the FaIR simple climate model for reliable  
 1094 future climate projections, *Geosci. Model Dev.*, 17, 8569–8592, <https://doi.org/10.5194/gmd-17-8569-2024>, 2024.



1095 Stevenson, D. S., Young, P. J., Naik, V., Lamarque, J.-F., Shindell, D. T., Voulgarakis, A., Skeie, R. B., Dalsoren, S. B.,  
 1096 Myhre, G., Berntsen, T. K., Folberth, G. A., Rumbold, S. T., Collins, W. J., MacKenzie, I. A., Doherty, R. M., Zeng, G., van  
 1097 Noije, T. P. C., Strunk, A., Bergmann, D., Cameron-Smith, P., Plummer, D. A., Strode, S. A., Horowitz, L., Lee, Y. H., Szopa,  
 1098 S., Sudo, K., Nagashima, T., Josse, B., Cionni, I., Righi, M., Eyring, V., Conley, A., Bowman, K. W., Wild, O., and Archibald,  
 1099 A.: Tropospheric ozone changes, radiative forcing and attribution to emissions in the Atmospheric Chemistry and Climate  
 1100 Model Intercomparison Project (ACCMIP), *Atmos. Chem. Phys.*, 13, 3063–3085, <https://doi.org/10.5194/acp-13-3063-2013>,  
 1101 2013.  
 1102 Steiner, A. K., Ladstädter, F., Randel, W. J., Maycock, A. C., Fu, Q., Claud, C., Gleisner, H., Haimberger, L., Ho, S.-P.,  
 1103 Keckhut, P., Leblanc, T., Mears, C., Polvani, L. M., Santer, B. D., Schmidt, T., Sofieva, V., Wing, R., and Zou, C.-Z.: Observed  
 1104 Temperature Changes in the Troposphere and Stratosphere from 1979 to 2018, *J. Climate*, 33, 8165–8194,  
 1105 <https://doi.org/10.1175/JCLI-D-19-0998.1>, 2020.  
 1106 Sun, W., Li, Q., Huang, B., Cheng, J., Song, Z., Li, H., Dong, W., Zhai, P., and Jones, P.: The Assessment of Global Surface  
 1107 Temperature Change from 1850s: The C-LSAT2.0 Ensemble and the CMST-Interim Datasets, *Advances in Atmospheric*  
 1108 *Sciences*, 38, 875–888, <https://doi.org/10.1007/s00376-021-1012-3>, 2021.  
 1109 Szopa, S., V. Naik, B. Adhikary, P. Artaxo, T. Berntsen, W.D. Collins, S. Fuzzi, L. Gallardo, A. Kiendler-Scharr, Z. Klimont,  
 1110 H. Liao, N. Unger, and P. Zanis: Short-Lived Climate Forcers. In *Climate Change 2021: The Physical Science Basis*.  
 1111 Contribution of Working Group I to the Sixth Assessment Report of the Intergovernmental Panel on Climate Change [Masson-  
 1112 Delmotte, V., P. Zhai, A. Pirani, S.L. Connors, C. Péan, S. Berger, N. Caud, Y. Chen, L. Goldfarb, M.I. Gomis, M. Huang, K.  
 1113 Leitzell, E. Lonnoy, J.B.R. Matthews, T.K. Maycock, T. Waterfield, O. Yelekçi, R. Yu, and B. Zhou (eds.)]. Cambridge  
 1114 University Press, Cambridge, United Kingdom and New York, NY, USA, pp. 817–922,  
 1115 <https://doi.org/10.1017/9781009157896.008>, 2021.  
 1116 Taha, G., Loughman, R., Zhu, T., Thomason, L., Kar, J., Rieger, L., and Bourassa, A.: OMPS LP Version 2.0 multi-wavelength  
 1117 aerosol extinction coefficient retrieval algorithm, *Atmos. Meas. Tech.*, 14, 1015–1036, [https://doi.org/10.5194/amt-14-1015-](https://doi.org/10.5194/amt-14-1015-2021)  
 1118 [2021](https://doi.org/10.5194/amt-14-1015-2021), 2021.  
 1119 Taylor, K. E., Crucifix, M., Braconnot, P., Hewitt, C. D., Doutriaux, C., Broccoli, A. J., Mitchell, J. F. B., and Webb, M. J.:  
 1120 Estimating Shortwave Radiative Forcing and Response in Climate Models, *J. Climate*, 20, 2530–2543,  
 1121 <https://doi.org/10.1175/JCLI4143.1>, 2007.  
 1122 Thomason, L. W., Ernest, N., Millán, L., Rieger, L., Bourassa, A., Vernier, J.-P., Manney, G., Luo, B., Arfeuille, F., and Peter,  
 1123 T.: A global space-based stratospheric aerosol climatology: 1979–2016, *Earth Syst. Sci. Dat.*, 10, 469–492,  
 1124 <https://doi.org/10.5194/essd-10-469-2018>, 2018.

1125 Thornhill, G. D., Collins, W. J., Kramer, R. J., Oliv  , D., Skeie, R. B., O'Connor, F. M., Abraham, N. L., Checa-Garcia, R.,  
 1126 Bauer, S. E., Deushi, M., Emmons, L. K., Forster, P. M., Horowitz, L. W., Johnson, B., Keeble, J., Lamarque, J.-F., Michou,  
 1127 M., Mills, M. J., Mulcahy, J. P., Myhre, G., Nabat, P., Naik, V., Oshima, N., Schulz, M., Smith, C. J., Takemura, T., Tilmes,  
 1128 S., Wu, T., Zeng, G., and Zhang, J.: Effective radiative forcing from emissions of reactive gases and aerosols – a multi-model  
 1129 comparison, *Atmos. Chem. Phys.*, 21, 853–874, <https://doi.org/10.5194/acp-21-853-2021>, 2021a.  
 1130 Thornhill, G., Collins, W., Oliv  , D., Skeie, R. B., Archibald, A., Bauer, S., Checa-Garcia, R., Fiedler, S., Folberth, G.,  
 1131 Gjermundsen, A., Horowitz, L., Lamarque, J.-F., Michou, M., Mulcahy, J., Nabat, P., Naik, V., O'Connor, F. M., Paulot, F.,  
 1132 Schulz, M., Scott, C. E., S  f  rian, R., Smith, C., Takemura, T., Tilmes, S., Tsigaridis, K., and Weber, J.: Climate-driven  
 1133 chemistry and aerosol feedbacks in CMIP6 Earth system models, *Atmos. Chem. Phys.*, 21, 1105–1126,  
 1134 <https://doi.org/10.5194/acp-21-1105-2021>, 2021b.  
 1135 Toohey, M. and Sigl, M.: Volcanic stratospheric sulfur injections and aerosol optical depth from 500\,BCE to 1900\,CE, *Earth*  
 1136 *Syst. Sci. Data*, 9, 809–831, <https://doi.org/10.5194/essd-9-809-2017>, 2017.  
 1137 Trewin, B., Cazenave, A., Howell, S., Huss, M., Isensee, K., Palmer, M. D., Tarasova, O., and Vermeulen, A.: Headline  
 1138 Indicators for Global Climate Monitoring, *Bulletin of the American Meteorological Society*, 102, E20–E37,  
 1139 <https://doi.org/10.1175/BAMS-D-19-0196.1>, 2021.  
 1140 Vanderkelen, I., van Lipzig, N. P. M., Lawrence, D. M., Droppers, B., Golub, M., Gosling, S. N., Janssen, A. B. G., Marc  ,  
 1141 R., Schmied, H. M., Perroud, M., Pierson, D., Pokhrel, Y., Satoh, Y., Schewe, J., Seneviratne, S. I., Stepanenko, V. M., Tan,  
 1142 Z., Woolway, R. I., and Thiery, W.: Global Heat Uptake by Inland Waters, *Geophysical Research Letters*, 47, e2020GL087867,  
 1143 <https://doi.org/10.1029/2020GL087867>, 2020.  
 1144 Vose, R. S., Huang, B., Yin, X., Arndt, D., Easterling, D. R., Lawrimore, J. H., Menne, M. J., Sanchez-Lugo, A., and Zhang,  
 1145 H. M.: Implementing Full Spatial Coverage in NOAA's Global Temperature Analysis, *Geophys. Res. Lett.*, 48,  
 1146 e2020GL090873, <https://doi.org/10.1029/2020GL090873>, 2021.  
 1147 Watson-Parris, D., Christensen, M. W., Laurenson, A., Clewley, D., Gryspeerd, E., and Stier, P.: Shipping regulations lead to  
 1148 large reduction in cloud perturbations, *Proc. Natl. Acad. Sci. U.S.A.*, 119, e2206885119,  
 1149 <https://doi.org/10.1073/pnas.2206885119>, 2022.  
 1150 van der Werf, G. R., Randerson, J. T., Giglio, L., van Leeuwen, T. T., Chen, Y., Rogers, B. M., Mu, M., van Marle, M. J. E.,  
 1151 Morton, D. C., Collatz, G. J., Yokelson, R. J., and Kasibhatla, P. S.: Global fire emissions estimates during 1997–2016, *Earth*  
 1152 *System Science Data*, 9, 697–720, <https://doi.org/10.5194/essd-9-697-2017>, 2017.  
 1153 World Meteorological Organization (WMO), 2025. State of the Global Climate 2024. WMO-No. 1368. World Meteorological  
 1154 Organization, <https://library.wmo.int/idurl/4/69455>, accessed 27 April 2025, 2025.



1155 Yuan, T., Song, H., Wood, R., Wang, C., Oreopoulos, L., Platnick, S. E., Von Hippel, S., Meyer, K., Light, S., and Wilcox,  
1156 E.: Global reduction in ship-tracks from sulfur regulations for shipping fuel, Sci. Adv., 8, eabn7988,  
1157 <https://doi.org/10.1126/sciadv.abn7988>, 2022.

1158 Zelinka, M. D., Andrews, T., Forster, P. M., and Taylor, K. E.: Quantifying components of aerosol-cloud-radiation interactions  
1159 in climate models, J. Geophys. Res.-Atmos., 119, 7599–7615, <https://doi.org/10.1002/2014JD021710>, 2014.

1160 Zelinka, M. D., Smith, C. J., Qin, Y., and Taylor, K. E.: Aerosol Effective Radiative Forcings in CMIP Models, EGUsphere,  
1161 <https://acp.copernicus.org/articles/23/8879/2023>, 2023.

1162

1163

1164
